# Supplementary material for: MaxEnt Modeling to Predict the Current and Future Distribution of Pomatosace filicula under Climate Change Scenarios on the Qinghai–Tibet Plateau
Source: MDPI journal article supplement (doi:10.3390/plants11050670), 2022-02-28

## Supplemental data

Article title: MaxEnt Modeling to Predict the Current and Future Distribution of *Pomatosace filicula* under Climate Change Scenarios on the Qinghai–Tibet Plateau

Authors: Kaiyang Chen, Bo Wang, Chen Chen and Guoying Zhou \*

Table. S1 Environmental indicators used in this paper to model the potential distribution of *Pomatosace filicula*. There are 8 soil and 1 terrain indicators, and 19 bioclimatic indicators

| Bioclimatic variables | Description                                          | Unit                 |
|-----------------------|------------------------------------------------------|----------------------|
| Bio1                  | Annual mean temperature                              | ° C                  |
| Bio2                  | Mean diurnal range                                   | ° C                  |
| Bio3                  | Isothermality (BIO2/BIO7) (* 100)                    | %                    |
| Bio4                  | Temperature seasonality (standard deviation *100)    | ° C                  |
| Bio5                  | Max temperature of warmest month                     | ° C                  |
| Bio6                  | Min temperature of coldest month                     | ° C                  |
| Bio7                  | Temperature annual range (BIO5-BIO6)                 | ° C                  |
| Bio8                  | Mean temperature of wettest quarter                  | ° C                  |
| Bio9                  | Mean temperature of driest quarter                   | ° C                  |
| Bio10                 | Mean temperature of warmest quarter                  | ° C                  |
| Bio11                 | Mean temperature of coldest quarter                  | ° C                  |
| Bio12                 | Annual precipitation                                 | mm                   |
| Bio13                 | Precipitation of wettest month                       | mm                   |
| Bio14                 | Precipitation of driest month                        | mm                   |
| Bio15                 | Precipitation seasonality (coefficient of variation) | 1                    |
| Bio16                 | Precipitation of wettest quarter                     | mm                   |
| Bio17                 | Precipitation of driest quarter                      | mm                   |
| Bio18                 | Precipitation of warmest quarter                     | mm                   |
| Bio19                 | Precipitation of coldest quarter                     | mm                   |
| alt                   | Elevation                                            | m                    |
| ph                    | Topsoil pH (H <sub>2</sub> O)                        | log(H <sup>+</sup> ) |
| an                    | Available nitrogen                                   | mg/kg                |
| ak                    | Available potassium                                  | mg/kg                |
| ap                    | Available phosphorus                                 | mg/kg                |
| tn                    | Total nitrogen                                       | mg/L                 |
| tk                    | Total potassium                                      | mg/L                 |
| tp                    | Total phosphorus                                     | mg/L                 |
| Som                   | soil organic matter                                  | g/kg                 |

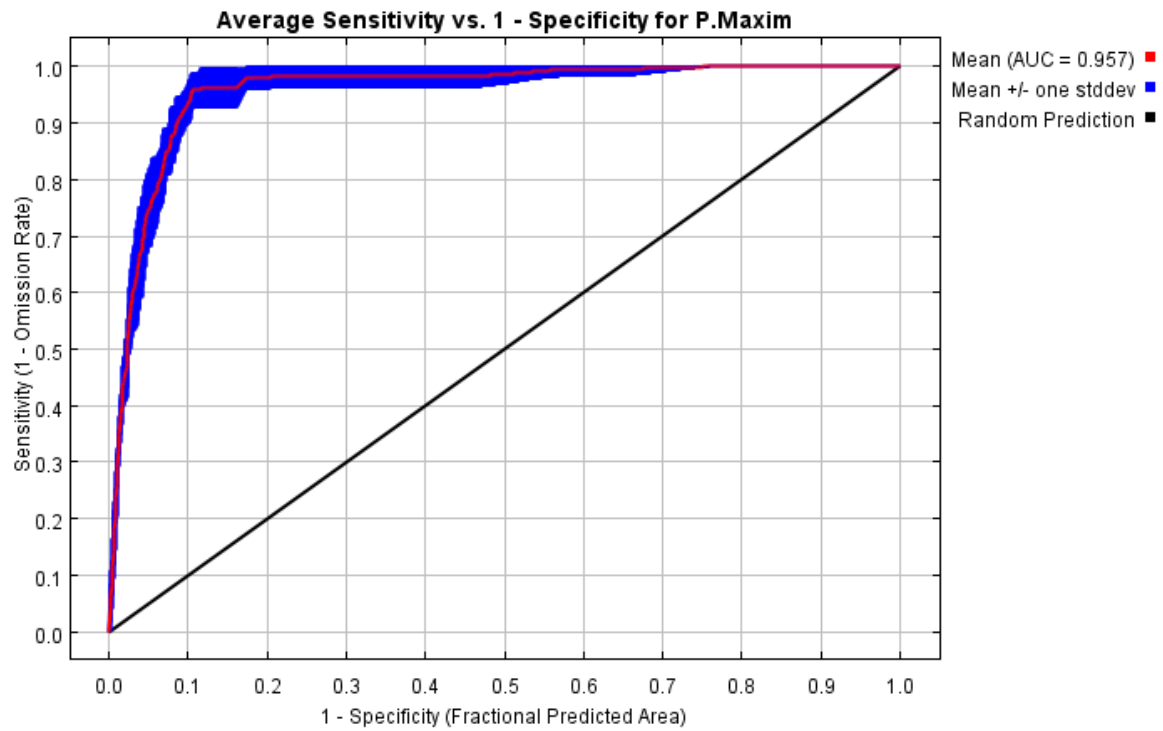

Figure S1 In the current situation, MaxEnt model is used to analyze the receiver operating characteristic (ROC) curve and average test AUC of *Pomatosace flicula*.

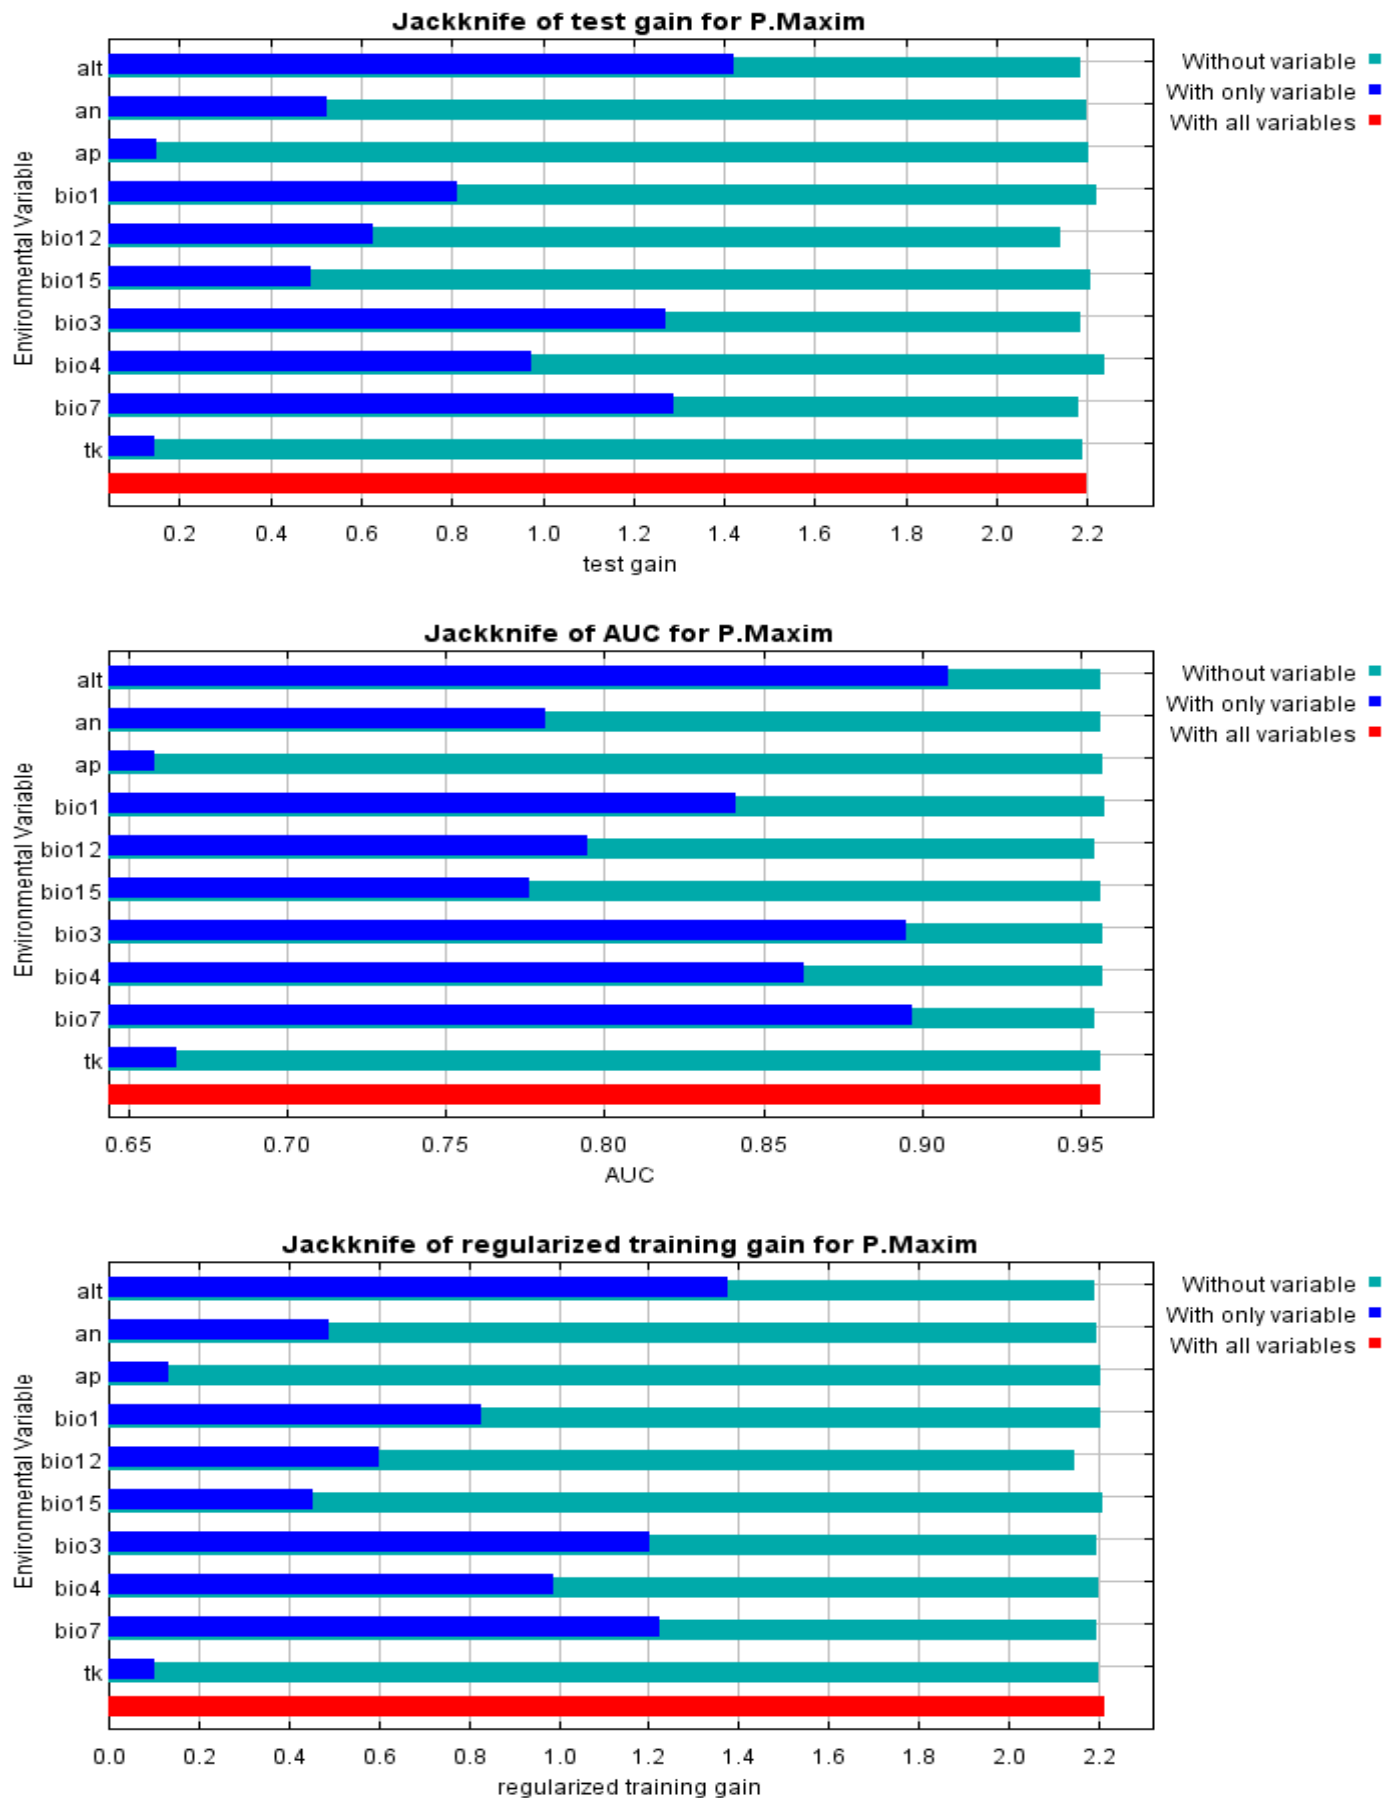

Figure S2 The results of the jackknife test of variables' contribution in modelling *Pomatosace flicula* distribution in the current situation (The regularized training gain describes how much better the Maxent distribution fits the presence data compared to a uniform distribution. The dark blue bars indicate that the gain from using each variable in isolation, the light blue bars indicate the gain lost by removing the single variable from the full model, and the red bar indicates the gain using all of the variables).

Table. S2 Comparison between the current distribution and the suitable areas of *P. pinnatifida* in 2050 and 2070 under four climate scenarios (RCP 2.6, RCP 4.5, RCP 6.0 and RCP 8.5) and five general circulation models (BCC-CSM1-1、

|                                     |        |      | Total suitable<br>region | Lowly<br>suitable<br>region | Moderately<br>suitable<br>region | Highly<br>suitable<br>region | unsuitable<br>habitat |
|-------------------------------------|--------|------|--------------------------|-----------------------------|----------------------------------|------------------------------|-----------------------|
| GISS-E2-R                           | RCP2.6 | 2050 | 2.30%                    | 15.08%                      | -7.87%                           | -4.91%                       | -2.30%                |
|                                     |        | 2070 | 2.03%                    | 20.85%                      | -22.43%                          | -16.52%                      | 18.10%                |
|                                     | RCP4.5 | 2050 | -14.54%                  | 7.73%                       | -45.14%                          | -14.66%                      | 52.07%                |
|                                     |        | 2070 | -15.99%                  | 9.16%                       | -49.88%                          | -22.81%                      | 63.53%                |
|                                     | RCP6.0 | 2050 | -4.55%                   | 15.18%                      | -30.72%                          | -16.98%                      | 32.52%                |
|                                     |        | 2070 | -4.64%                   | 16.92%                      | -34.05%                          | -8.04%                       | 25.16%                |
|                                     | RCP8.5 | 2050 | -14.00%                  | 8.80%                       | -45.02%                          | -17.59%                      | 53.81%                |
|                                     |        | 2070 | -20.50%                  | 6.86%                       | -56.71%                          | -34.93%                      | 84.78%                |
| CCSM4                               | RCP2.6 | 2050 | -6.22%                   | -2.47%                      | -12.41%                          | 0.20%                        | 14.68%                |
|                                     |        | 2070 | -7.11%                   | -2.84%                      | -13.72%                          | -3.89%                       | 20.45%                |
|                                     | RCP4.5 | 2050 | -14.38%                  | -7.14%                      | -25.38%                          | -6.24%                       | 38.76%                |
|                                     |        | 2070 | -14.87%                  | -6.55%                      | -27.10%                          | -9.19%                       | 42.84%                |
|                                     | RCP6.0 | 2050 | -8.43%                   | -4.01%                      | -15.64%                          | -0.45%                       | 20.10%                |
|                                     |        | 2070 | -10.54%                  | -5.43%                      | -18.19%                          | -8.15%                       | 31.77%                |
|                                     | RCP8.5 | 2050 | -24.13%                  | -10.90%                     | -41.20%                          | -38.99%                      | 91.08%                |
|                                     |        | 2070 | -25.17%                  | -15.00%                     | -39.38%                          | -24.87%                      | 79.25%                |
| HadGEM2-ES                          | RCP2.6 | 2050 | -3.05%                   | -1.43%                      | -9.74%                           | 42.58%                       | -31.41%               |
|                                     |        | 2070 | -4.96%                   | 2.01%                       | -15.93%                          | 6.56%                        | 7.36%                 |
|                                     | RCP4.5 | 2050 | -10.92%                  | -5.58%                      | -21.33%                          | 20.14%                       | 6.78%                 |
|                                     |        | 2070 | -4.85%                   | -4.03%                      | -10.19%                          | 37.70%                       | -23.48%               |
|                                     | RCP6.0 | 2050 | -14.18%                  | -9.39%                      | -23.57%                          | 13.85%                       | 19.11%                |
|                                     |        | 2070 | -5.71%                   | -3.21%                      | -12.11%                          | 23.05%                       | -7.73%                |
|                                     | RCP8.5 | 2050 | -32.53%                  | -9.20%                      | -64.28%                          | 14.50%                       | 58.98%                |
|                                     |        | 2070 | -16.53%                  | -7.93%                      | -30.75%                          | 8.07%                        | 30.62%                |
| BCC-CSM1-1                          | RCP2.6 | 2050 | -5.73%                   | -4.80%                      | -8.63%                           | 6.64%                        | 6.78%                 |
|                                     |        | 2070 | -7.11%                   | -2.84%                      | -13.72%                          | -3.89%                       | 20.45%                |
|                                     | RCP4.5 | 2050 | -12.26%                  | -3.84%                      | -22.46%                          | -32.21%                      | 58.50%                |
|                                     |        | 2070 | -5.73%                   | -4.80%                      | -8.63%                           | 6.64%                        | 6.78%                 |
|                                     | RCP6.0 | 2050 | -17.20%                  | -7.88%                      | -29.58%                          | -25.63%                      | 63.09%                |
|                                     |        | 2070 | -19.18%                  | -9.76%                      | -31.51%                          | -29.30%                      | 70.58%                |
|                                     | RCP8.5 | 2050 | -13.16%                  | -8.59%                      | -18.89%                          | -24.48%                      | 51.96%                |
|                                     |        | 2070 | -20.19%                  | -6.77%                      | -35.81%                          | -55.02%                      | 97.60%                |
| MIROC5                              | RCP2.6 | 2050 | -2.97%                   | -14.32%                     | 8.03%                            | 40.79%                       | -34.50%               |
|                                     |        | 2070 | -6.33%                   | -12.55%                     | -1.25%                           | 25.90%                       | -12.10%               |
|                                     | RCP4.5 | 2050 | -5.80%                   | -13.96%                     | 0.95%                            | 37.44%                       | -24.42%               |
|                                     |        | 2070 | -7.65%                   | -14.02%                     | -2.90%                           | 31.12%                       | -14.19%               |
|                                     | RCP6.0 | 2050 | -12.72%                  | -16.37%                     | -10.77%                          | 15.95%                       | 11.18%                |
|                                     |        | 2070 | -6.52%                   | -13.99%                     | -0.23%                           | 31.41%                       | -17.19%               |
|                                     | RCP8.5 | 2050 | -13.12%                  | -13.99%                     | -13.72%                          | 1.69%                        | 26.02%                |
|                                     |        | 2070 | -10.25%                  | 3.12%                       | -27.66%                          | -24.20%                      | 48.75%                |
| CCSM4、GIS-E2-R、HadGEM2-ES and MIROC |        |      |                          |                             |                                  |                              |                       |

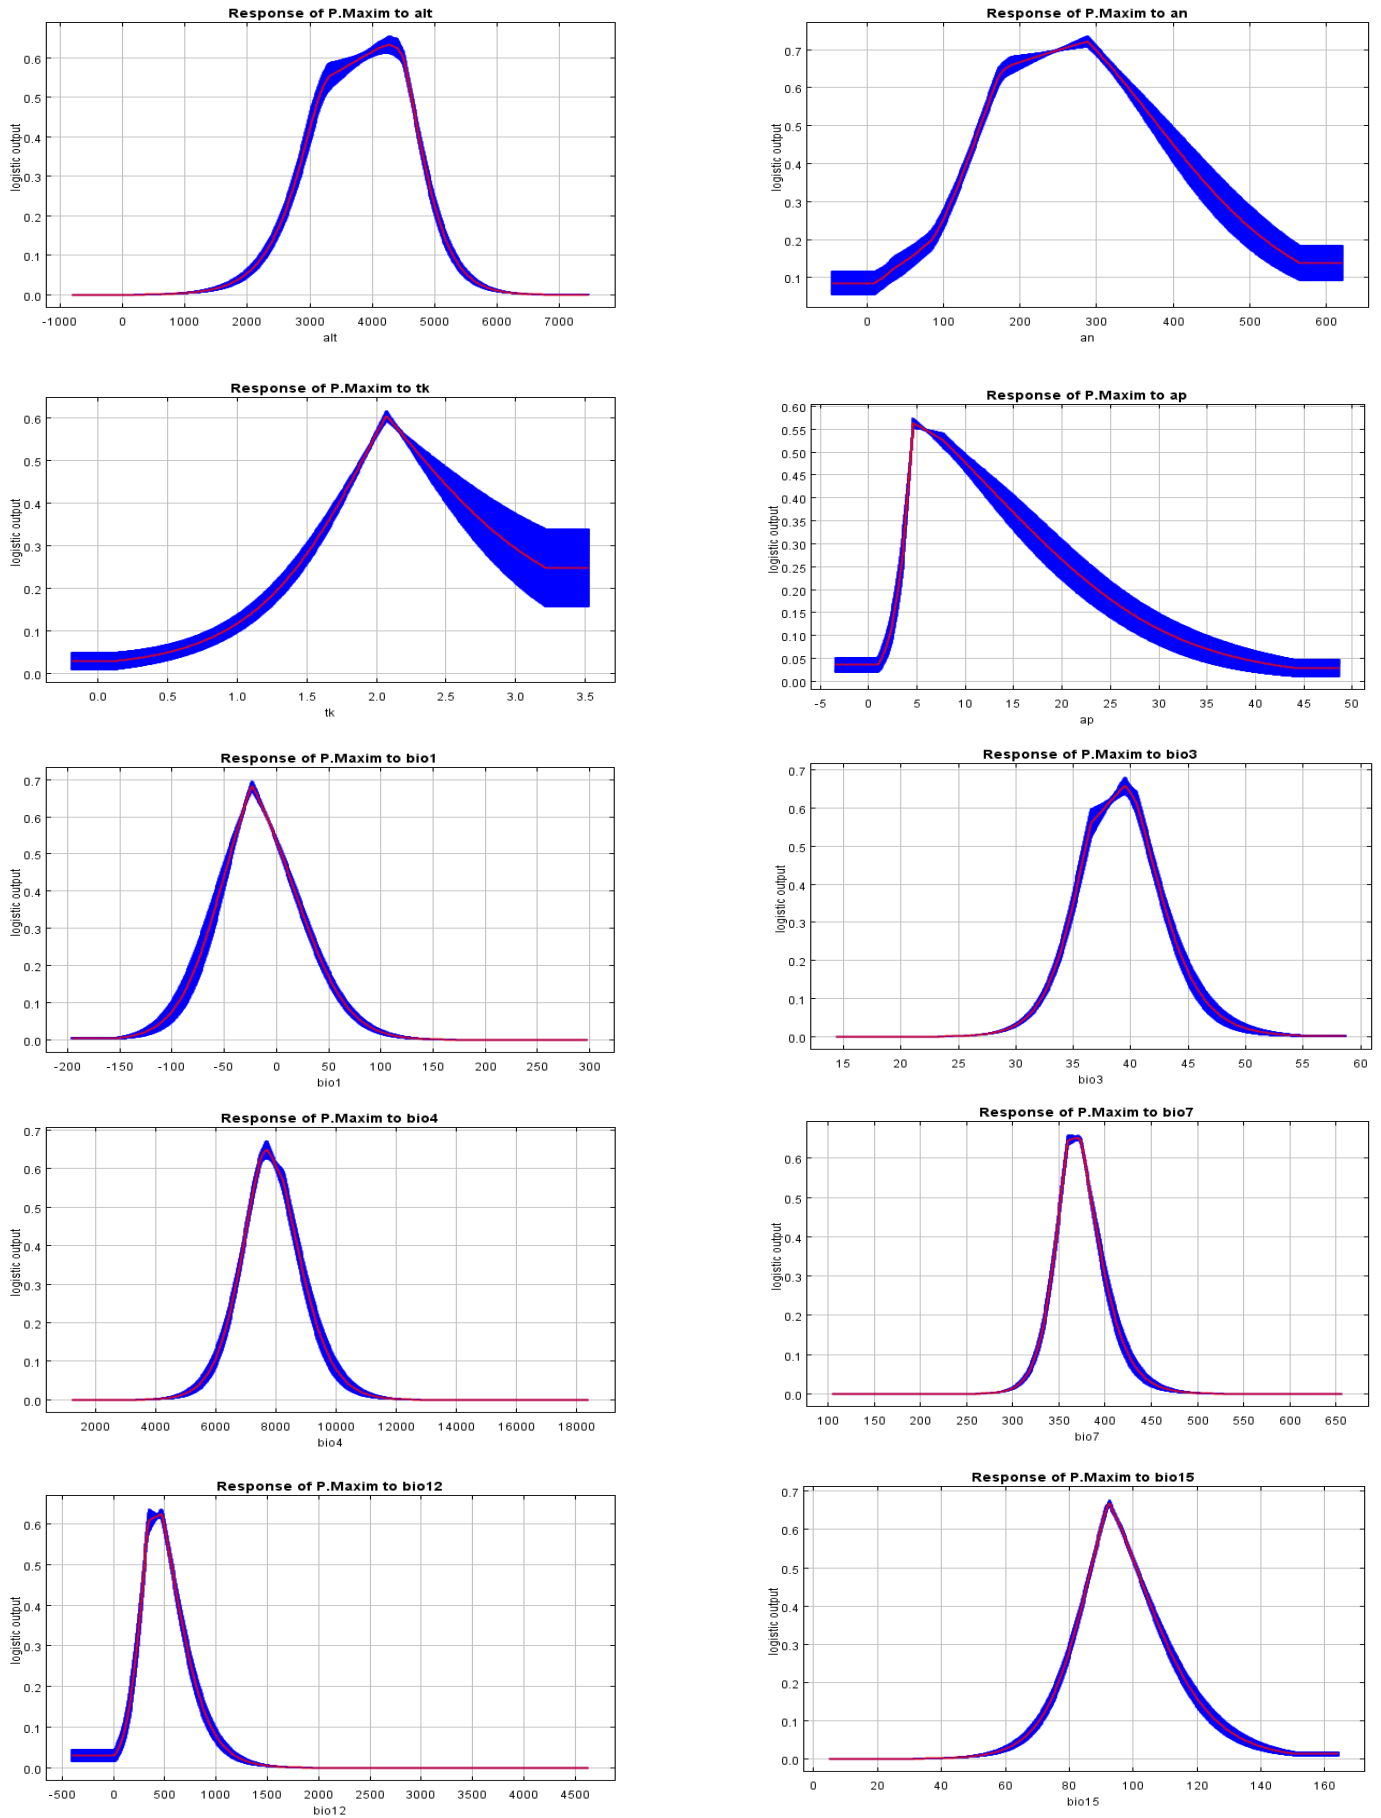

Figure S3 Response curves of 10 environmental variables in habitat distribution model of *Pomatosace filicula*. alt: elevation(m), an Available :nitrogen(mg/kg), tk: Total potassium(mg/L),ap: Available phosphorus(mg/kg), bio1:Annual mean temperature(°C), bio3: Isothermality (BIO2/BIO7× 100)(%),bio4:Temperature seasonality (standard deviation ×100)(%), bio7:Temperature annual range (BIO5-

Table. S3 Precipitation of 24 observation points in the middle and high suitable area and low suitable area of the Qinghai Tibet Plateau from 1952 to 2016.

| medium and high suitable areas | Annual precipitation | low suitable area | Annual precipitation |
|--------------------------------|----------------------|-------------------|----------------------|
| Ping'an                        | 329.7                | Lenghu            | 16.4                 |
| Qumalai                        | 412.4                | Xiaozaohe         | 27.9                 |
| Quinan                         | 416.3                | Geermu            | 42.6                 |
| Tongde                         | 430.9                | Nuomuhong         | 45.4                 |
| Naqu                           | 434.8                | Dulan             | 202.9                |
| Qinghaihu                      | 513.2                | Wudaoliang        | 293.8                |
| Zaduo                          | 527.3                | Tuotuohe          | 294.7                |
| Henan                          | 583.8                | Jiangzi           | 284.7                |
| Nangqian                       | 536.4                | Minhe             | 347.0                |
| Yushu                          | 488.4                | Shiquanhe         | 71.4                 |
| Huangzhong                     | 533.2                | Gaize             | 181.5                |
| Hualong                        | 460.5                | Jingyuan          | 232.5                |

Figure S4 In the current situation, MaxEnt model is used to analyze the receiver operating characteristic (ROC) curve and average test AUC of *Pomatosace filicula*. Four climate scenarios (RCP 2.6, RCP 4.5, RCP 6.0 and RCP 8.5) and five general circulation models (BCC-CSM1-1C-  
CSM1-1、CCSM4、GIS-E2-R、HadDGEM2-ES and MIROC5) in 2050 and 2070 respectively.

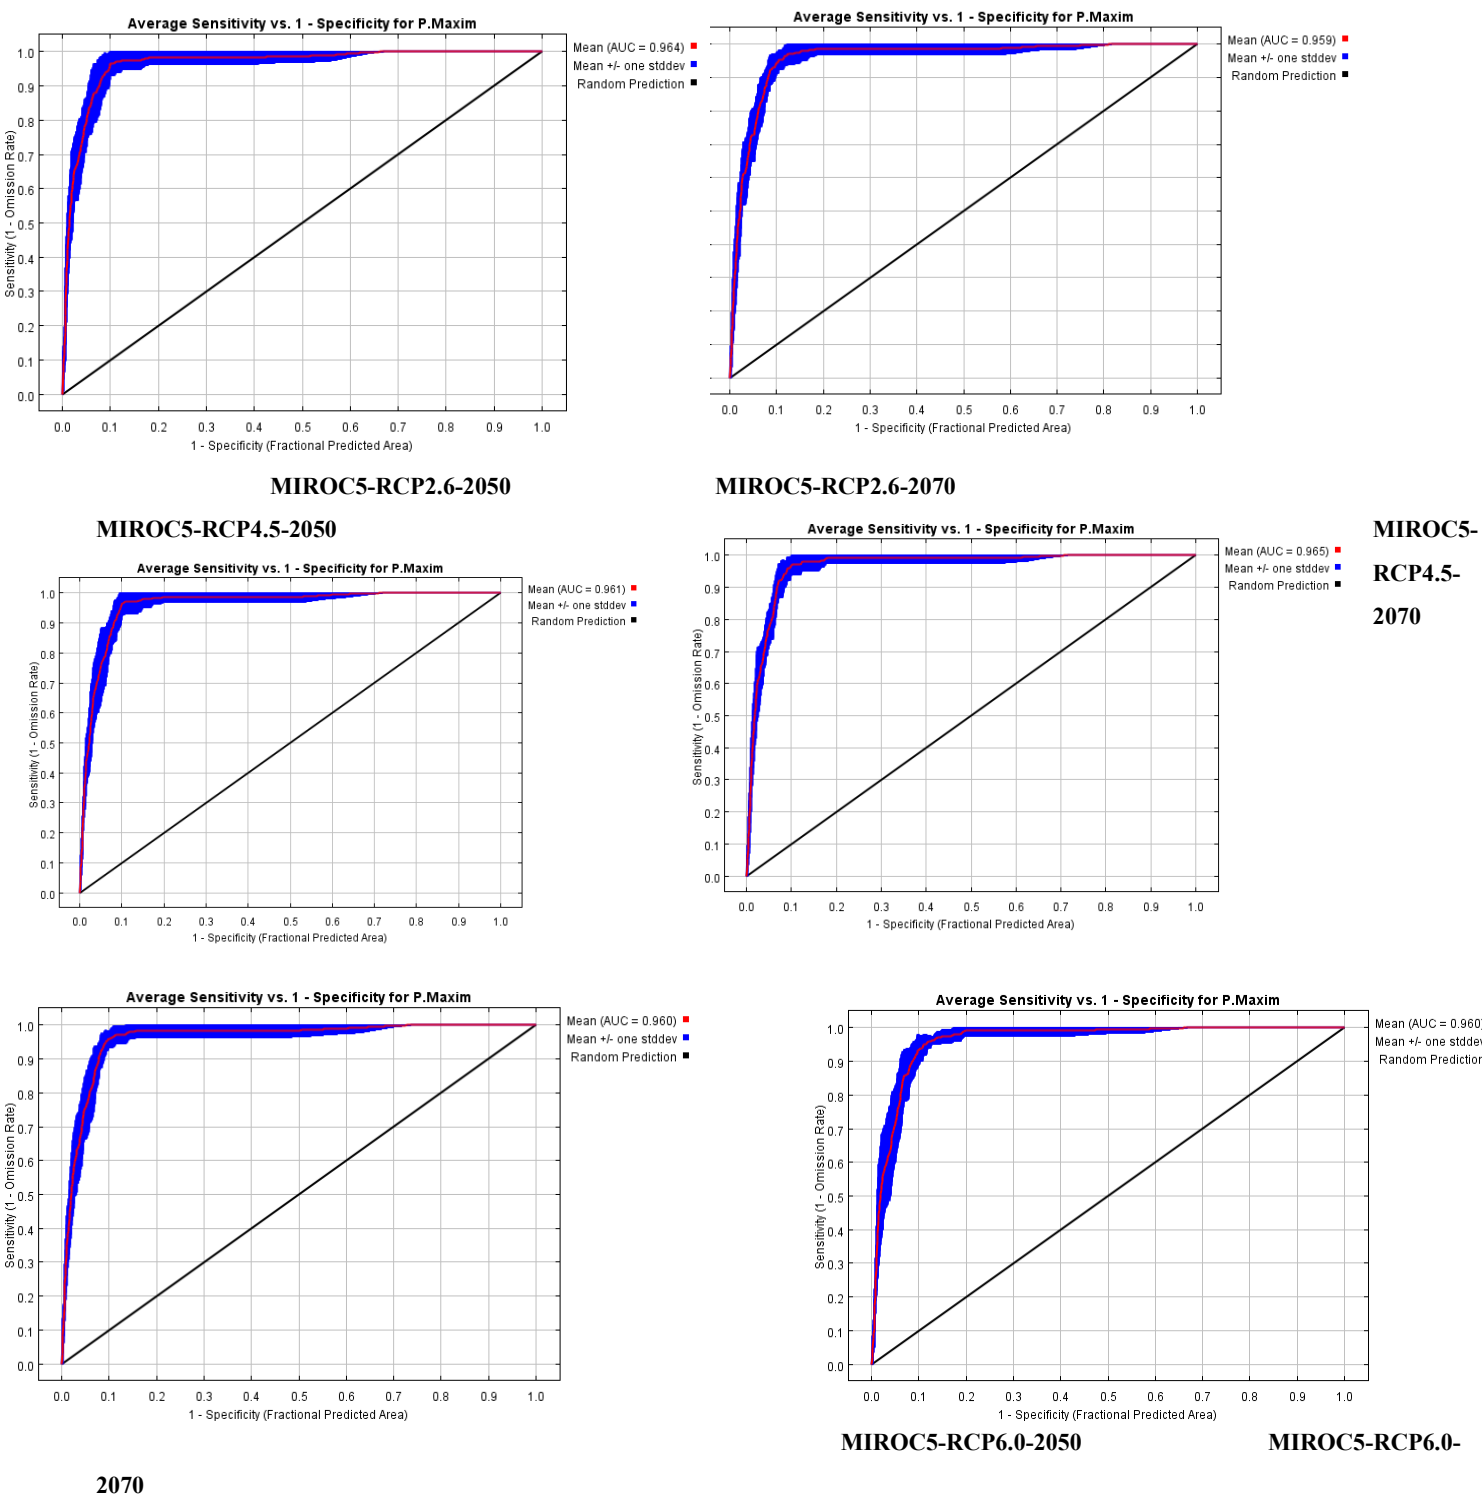

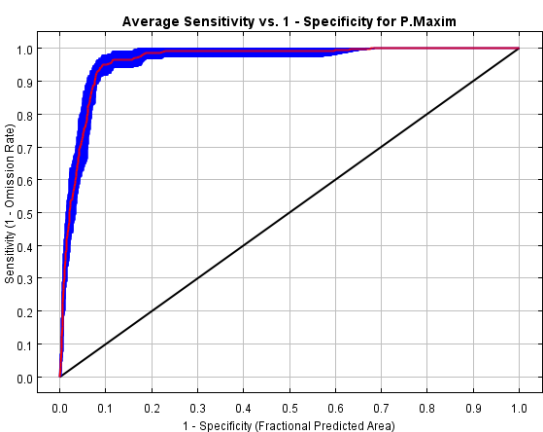

MIROC5-RCP6.0-2050

MIROC5-RCP8.5-2070

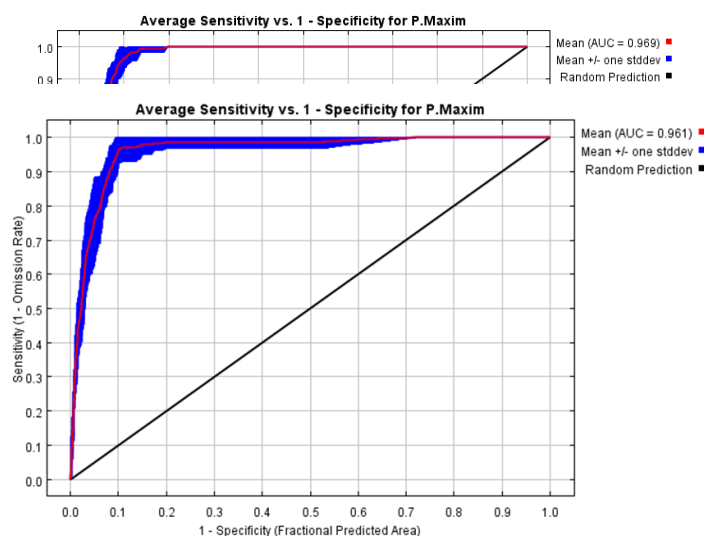

BCC-CSM1-1-RCP2.6-2050

RCP2.6-2050

BCC-CSM1-1-

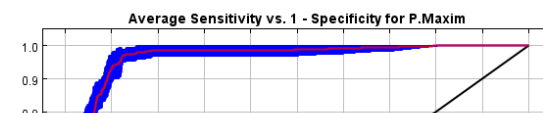

BCC-CSM1-1-RCP4.5-2050

BCC-CSM1-1-

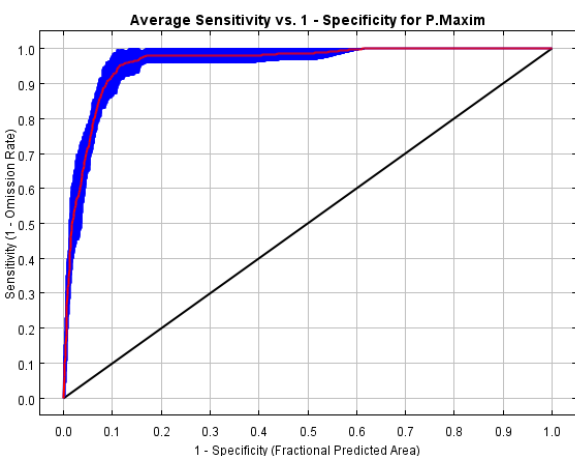

RCP4.5-2070

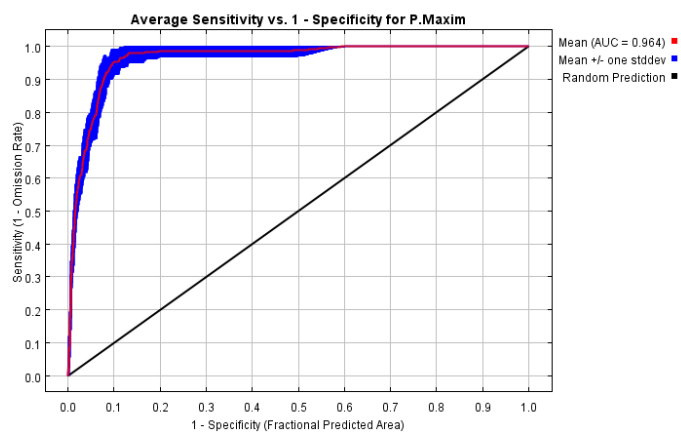



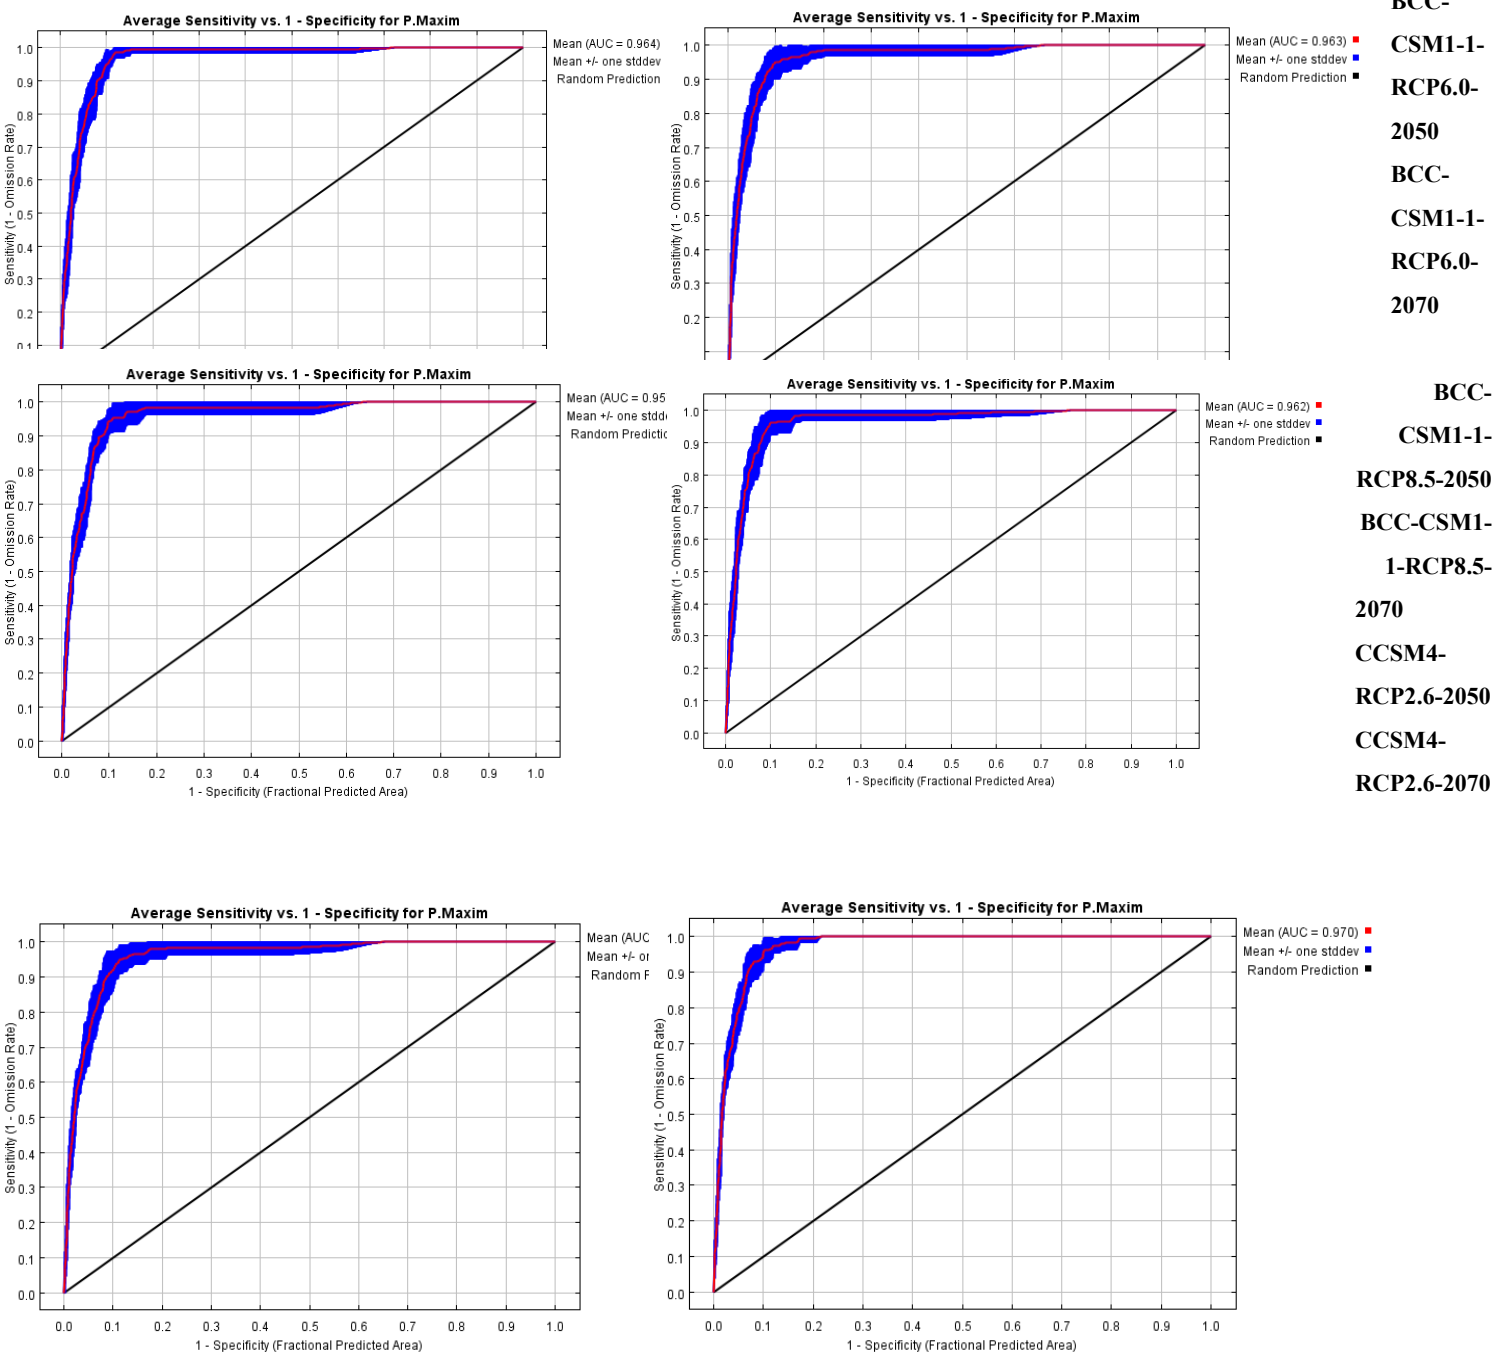

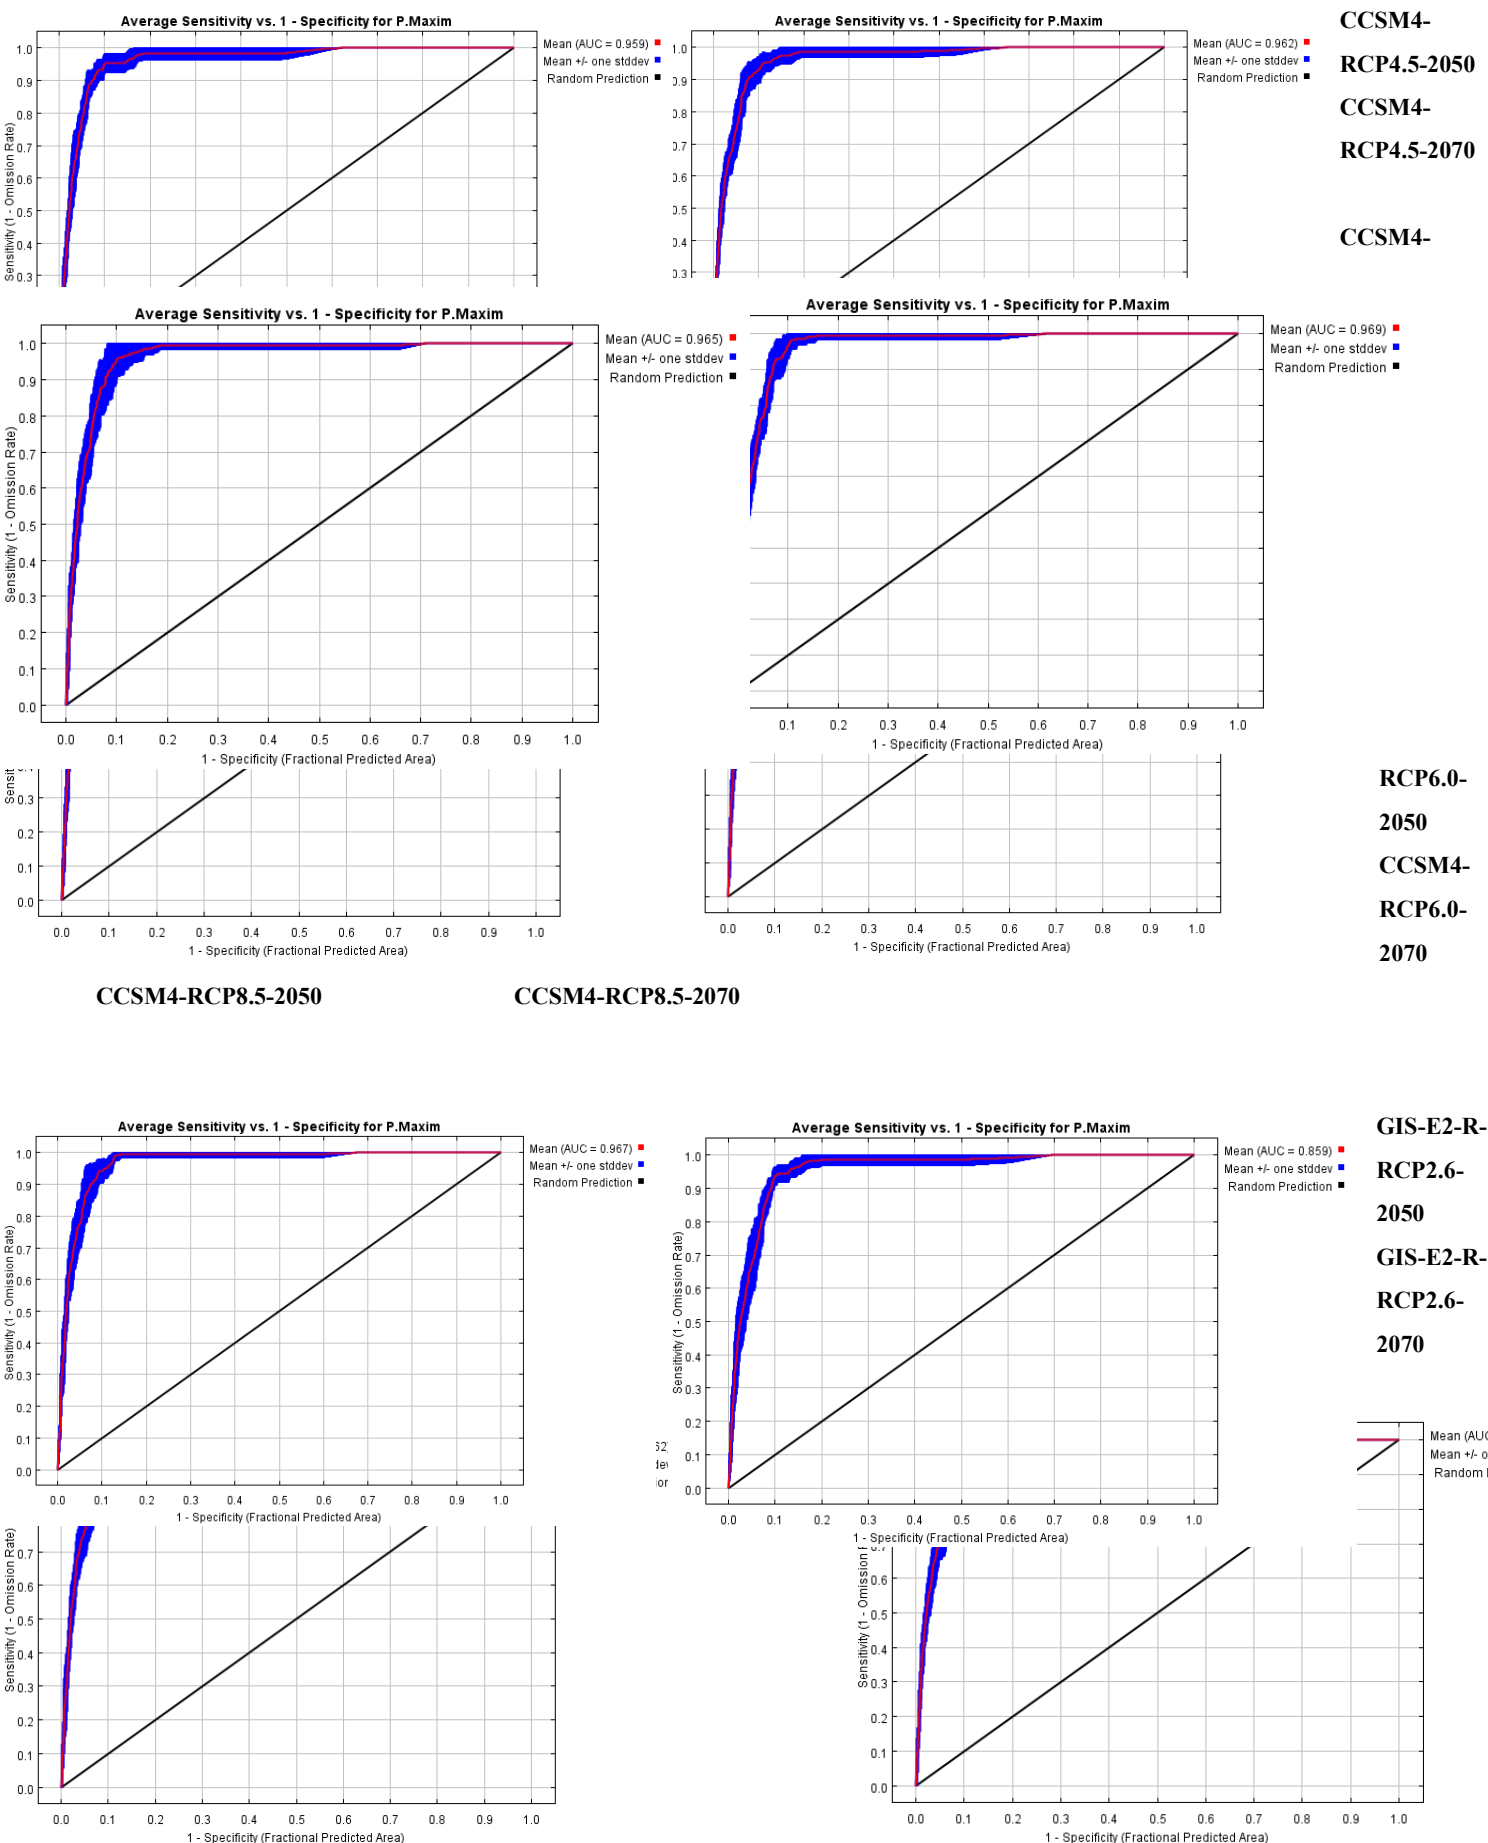

GIS-E2-R-RCP4.5-2050

GIS-E2-R-RCP4.5-2070

GIS-E2-R-RCP6.0-2050

GIS-E2-R-RCP6.0-2070

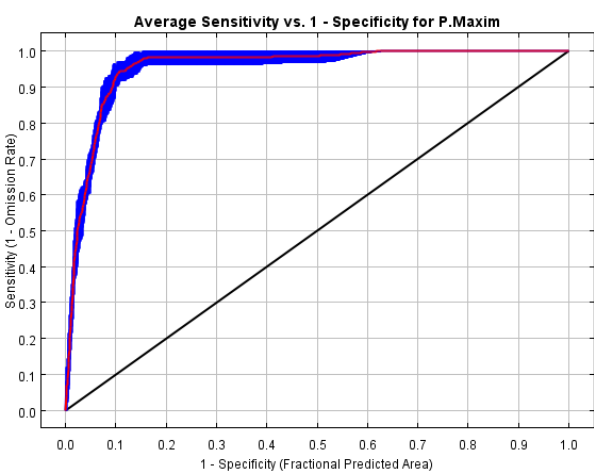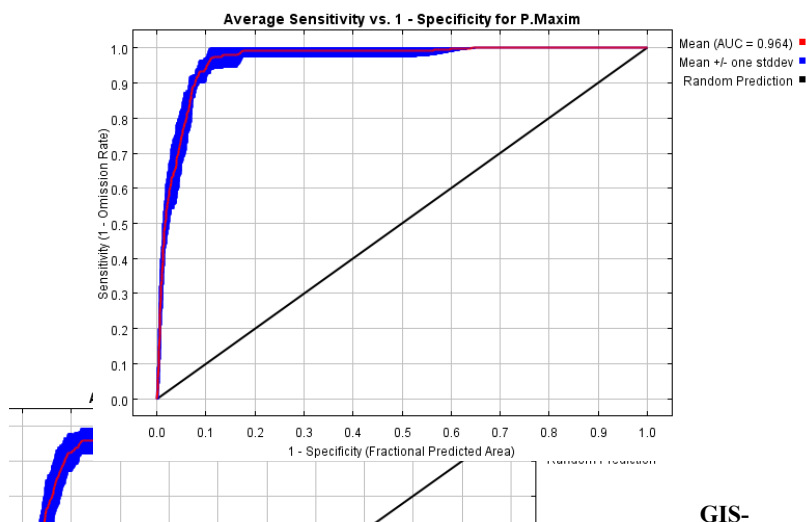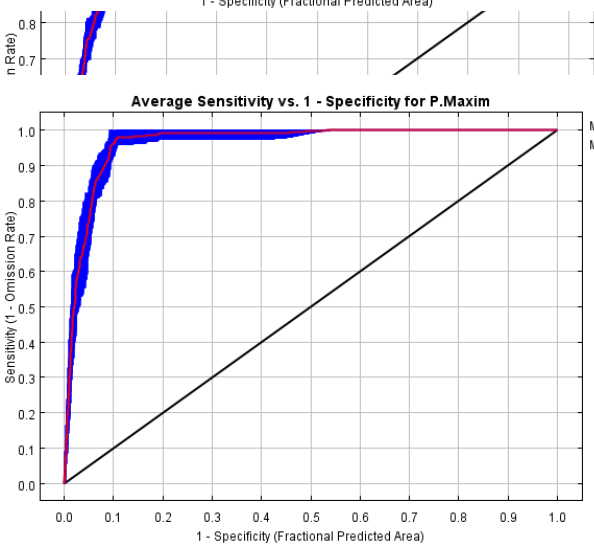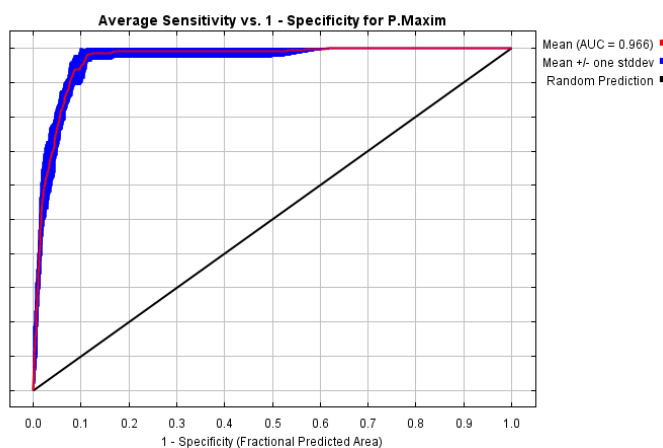

RCP8.5-2050

GIS-E2-R-RCP8.5-2070

HadDGEM2-ES-RCP2.6-2050

HadDGEM2-ES-RCP2.6-2070

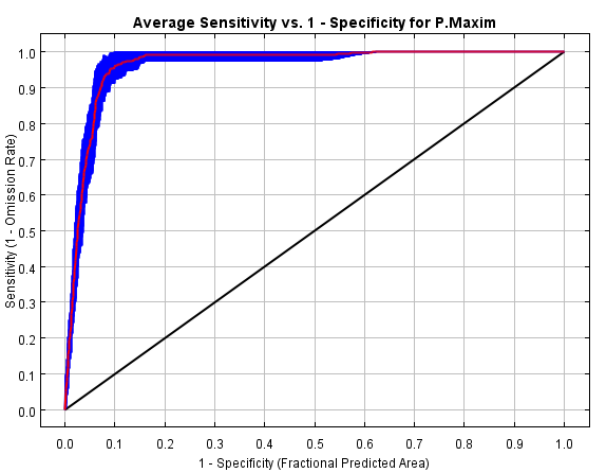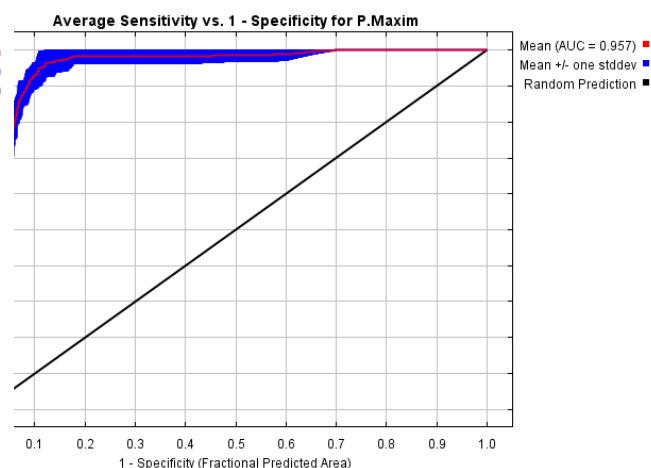

## HadDGEM2-ES-RCP4.5-2050

## HadDGEM2-ES-RCP4.5-2070

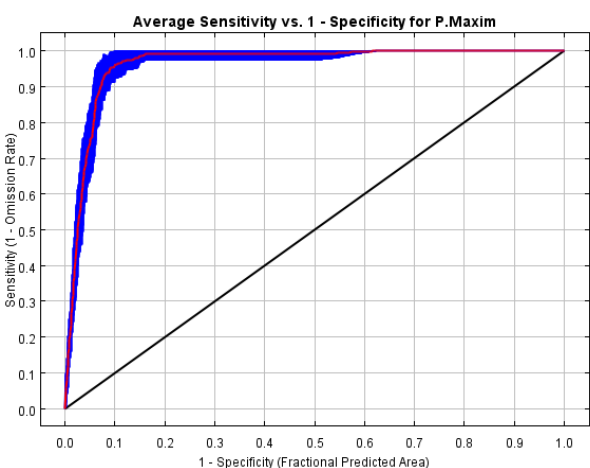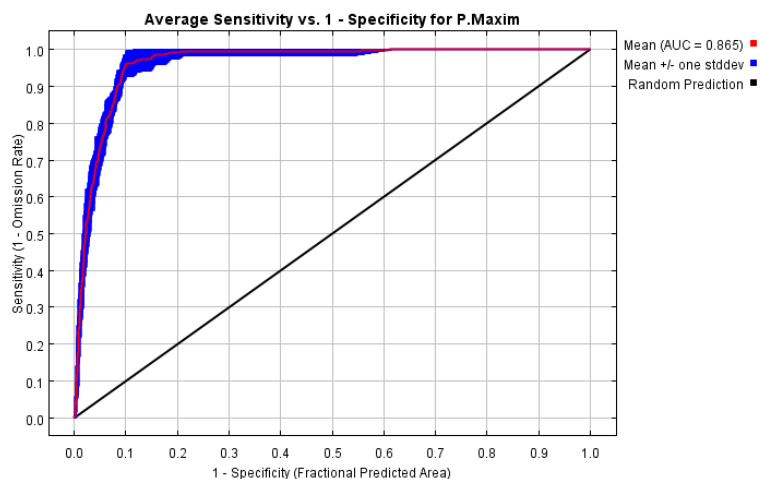

## HadDGEM2-ES -RCP6.0-2050

## HadDGEM2-ES-RCP6.0-2070

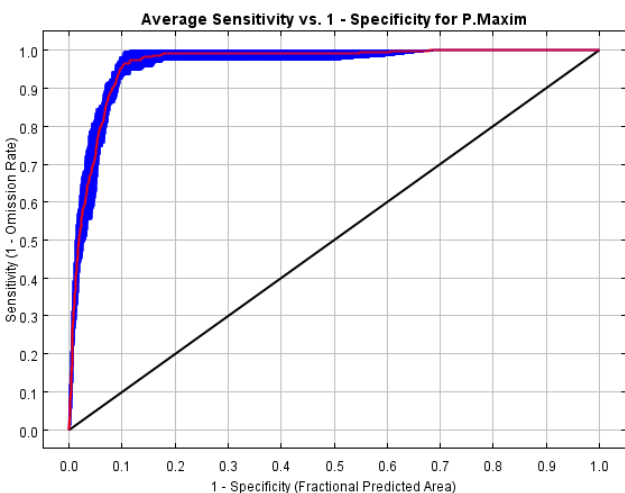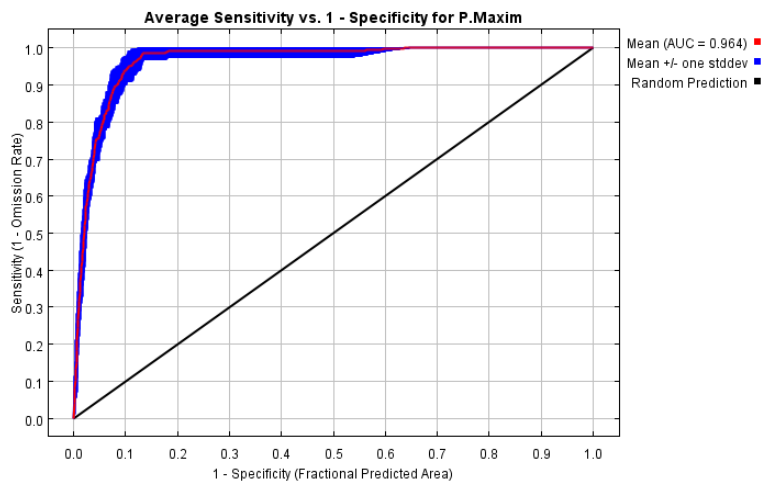

## HadDGEM2-ES -RCP8.5-2050

## HadDGEM2-ES-RCP8.5-2070

Figure S5. The results of the jackknife test of variables' contribution in modelling *Pomatosace filicula* distribution in 2050 and 2070 under four climate scenarios (RCP 2.6, RCP 4.5, RCP 6.0 and RCP 8.5) and five general circulation models ( BCC-CSM1-1, CCSM4, GIS-E2-R, HadGEM2-ES and MIROC5). (The regularized training gain describes how much better the Maxent distribution fits the presence data compared to a uniform distribution. The dark blue bars indicate tHadGEM2-ES the gain from using each variable in isolation, the light blue bars indicate the gain lost by removing the single variable from the full model, and the red bar indicates the gain using all of the variables).

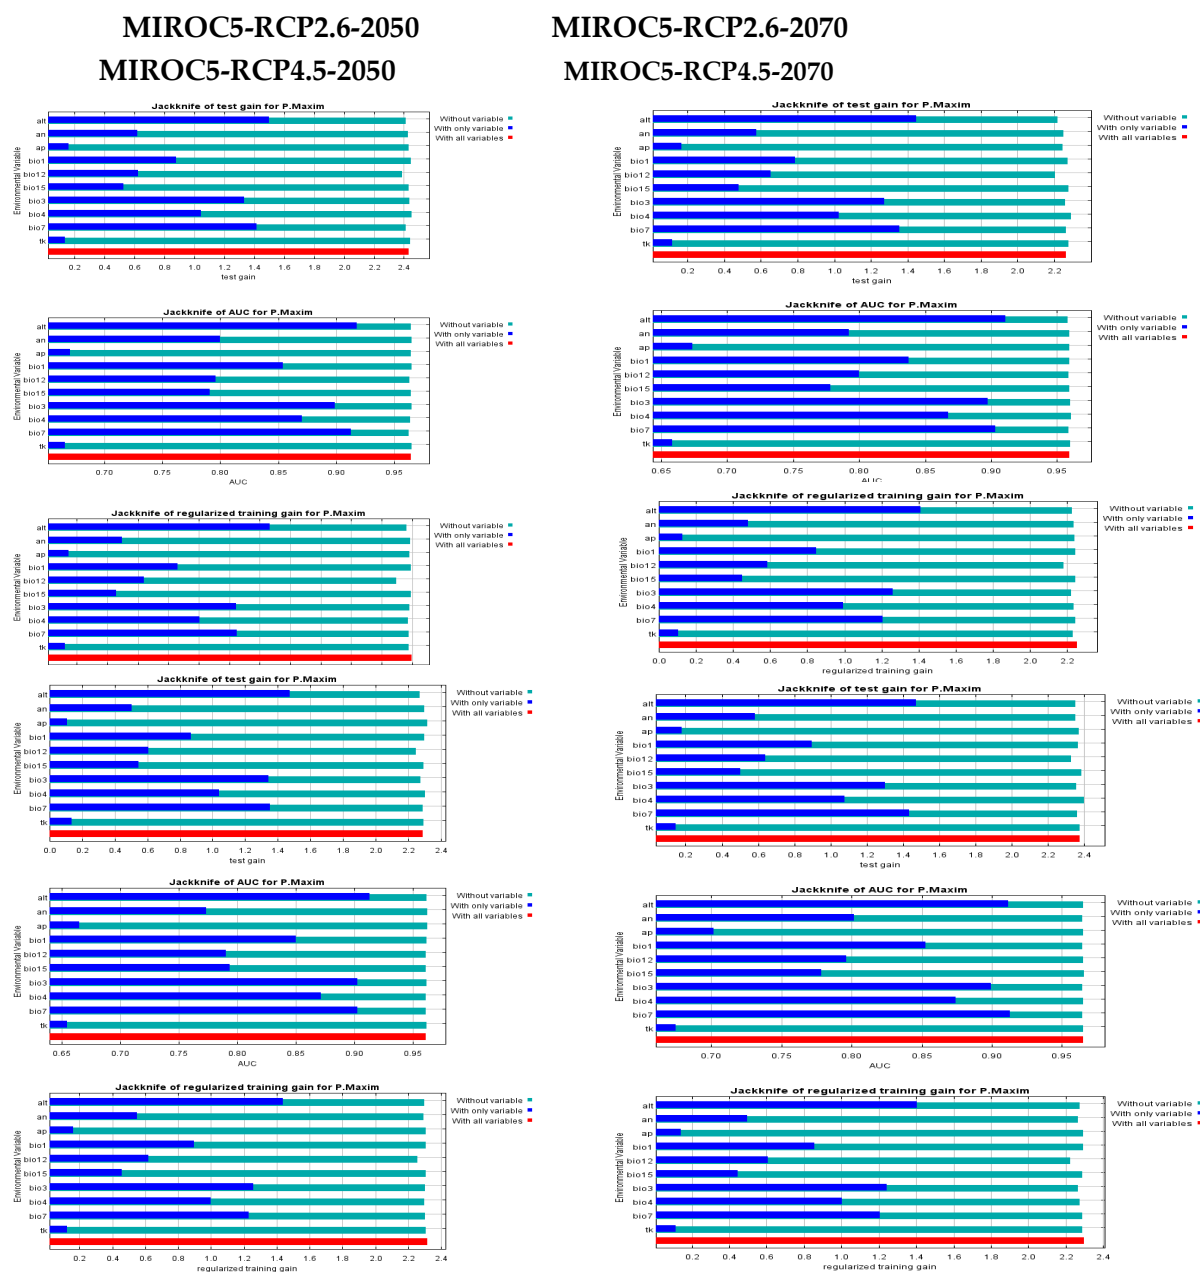

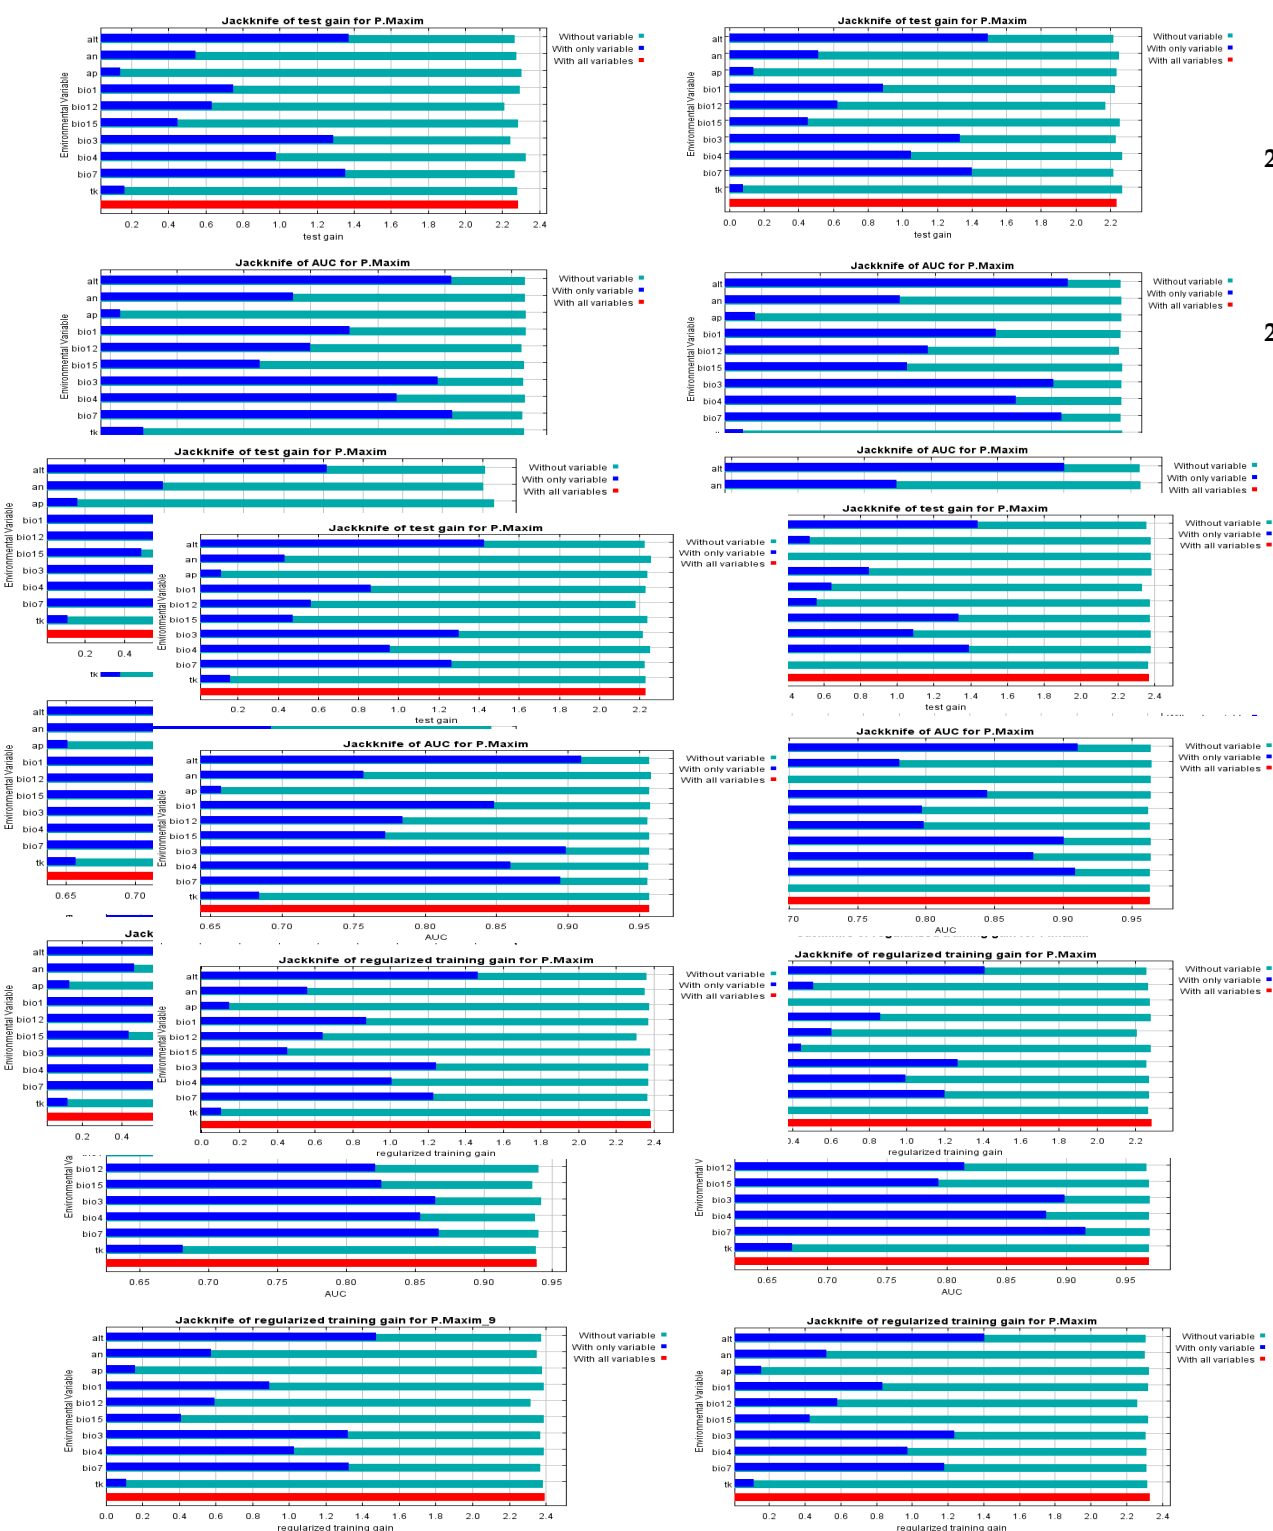

MIROC5-  
RCP6.0-2050  
MIROC5-RCP8.5-  
2070

MIROC5-  
RCP6.0-2050  
MIROC5-RCP8.5-  
2070

BCCSM4-CSM1-  
1-RCP2.6-2050  
BCCSM4-  
CSM1-1-  
RCP2.6-2070

BCCSM4-  
CSM1-1-  
RCP4.5-2050  
BCCSM4-  
CSM1-1-  
RCP4.5-2070

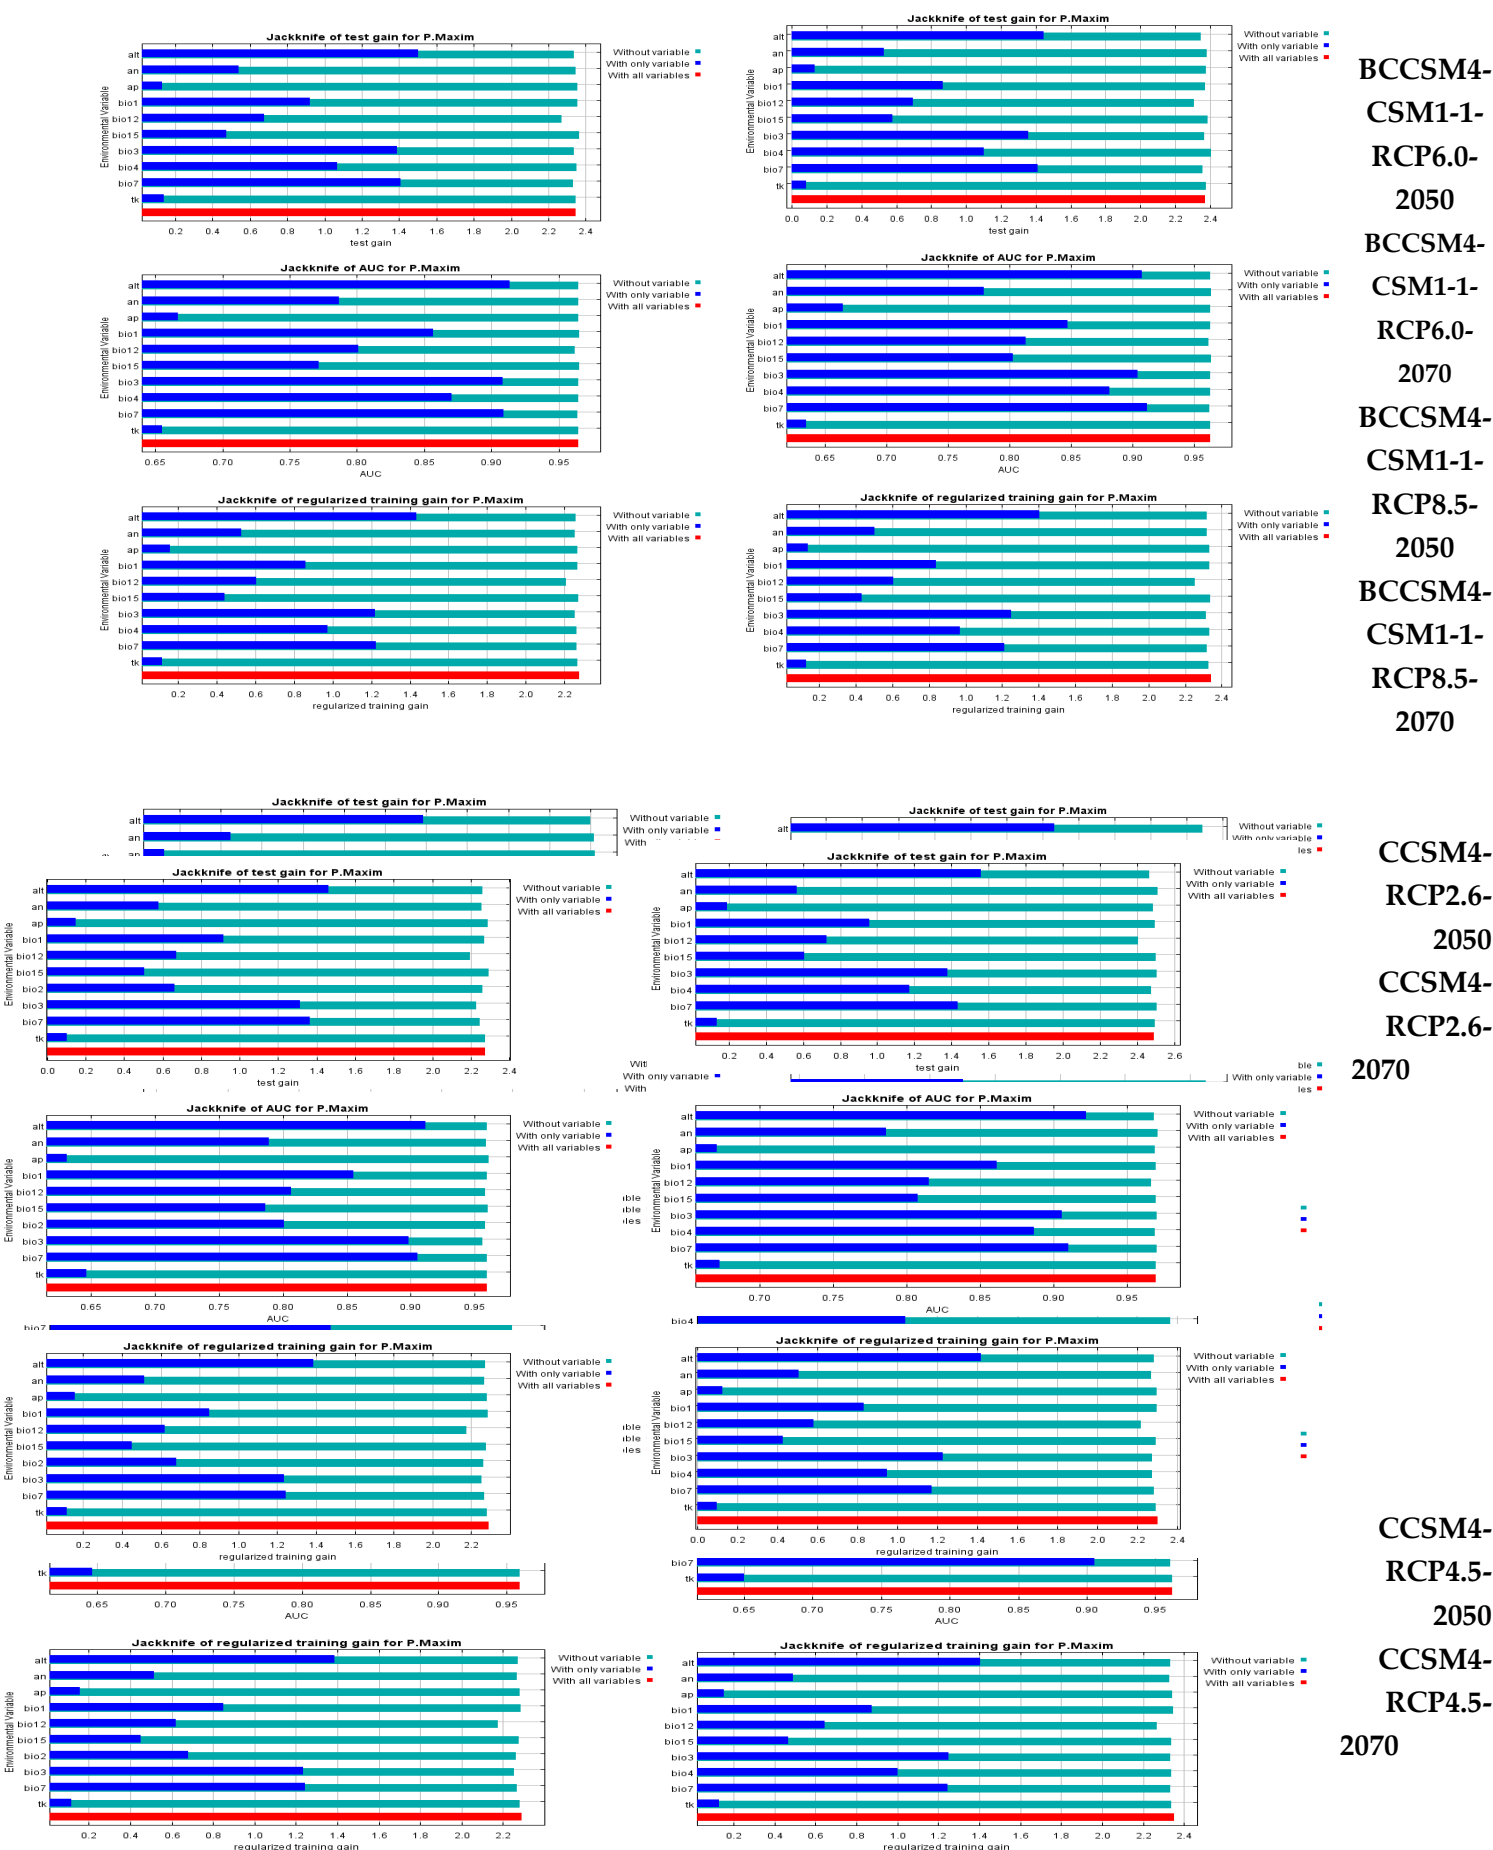

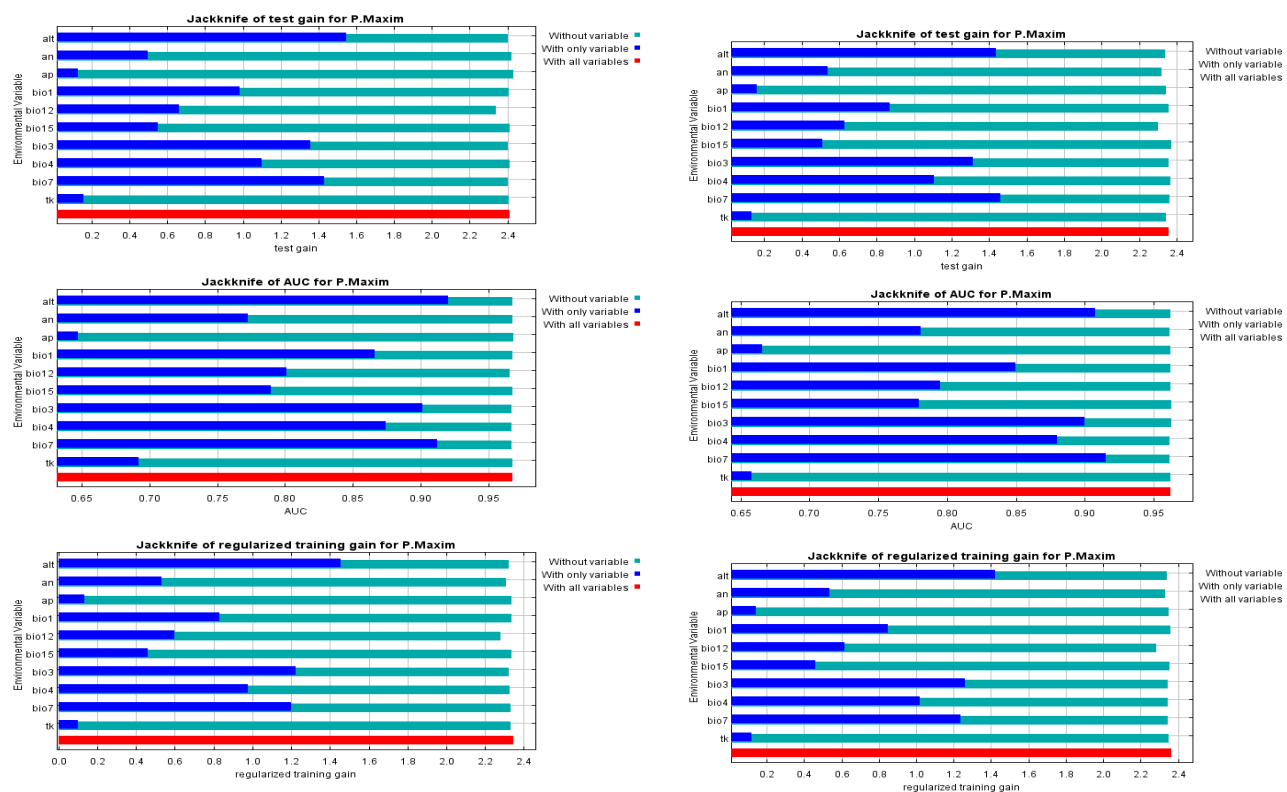

CCSM4-RCP6.0-2050

CCSM4-RCP6.0-2070

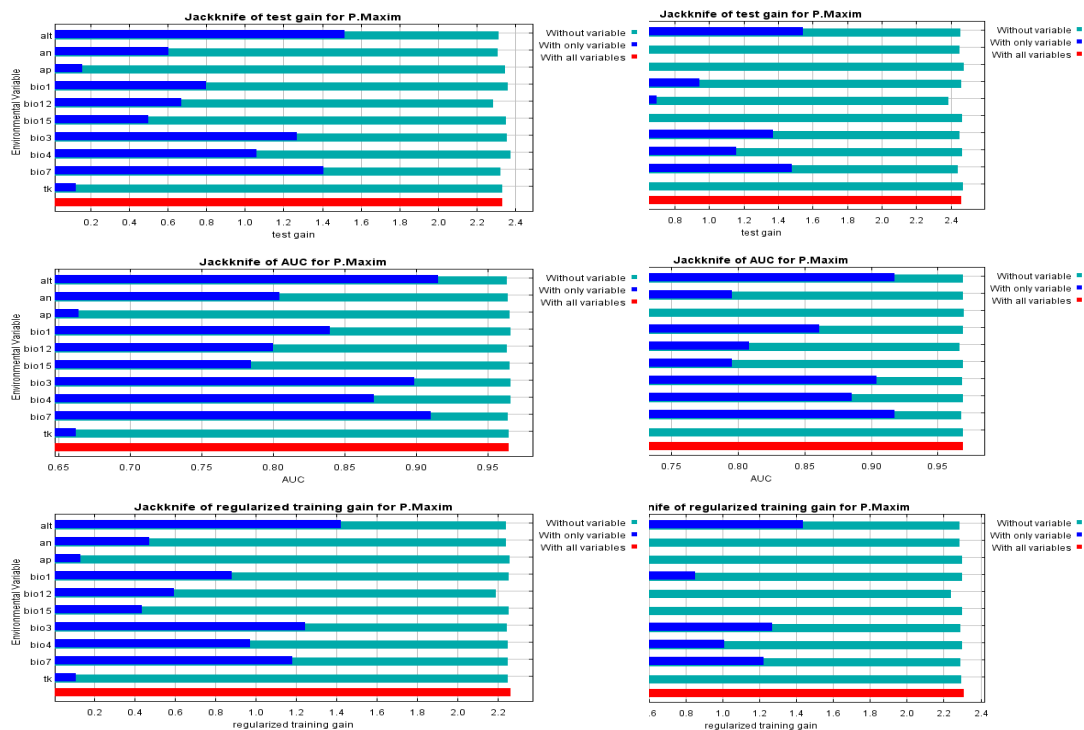

CCSM4-  
RCP8.5-2050  
CCSM4-  
RCP8.5-2070



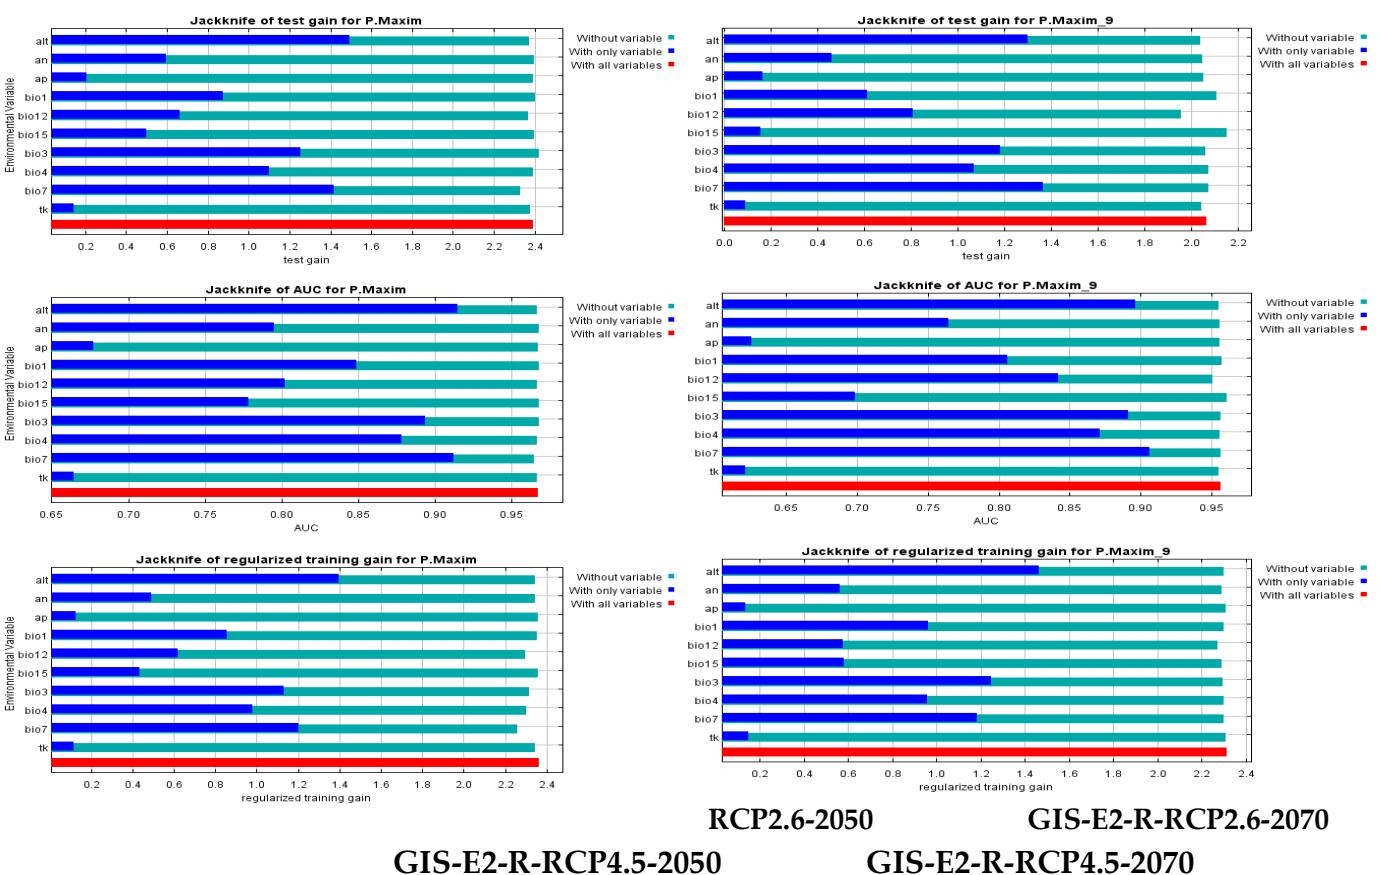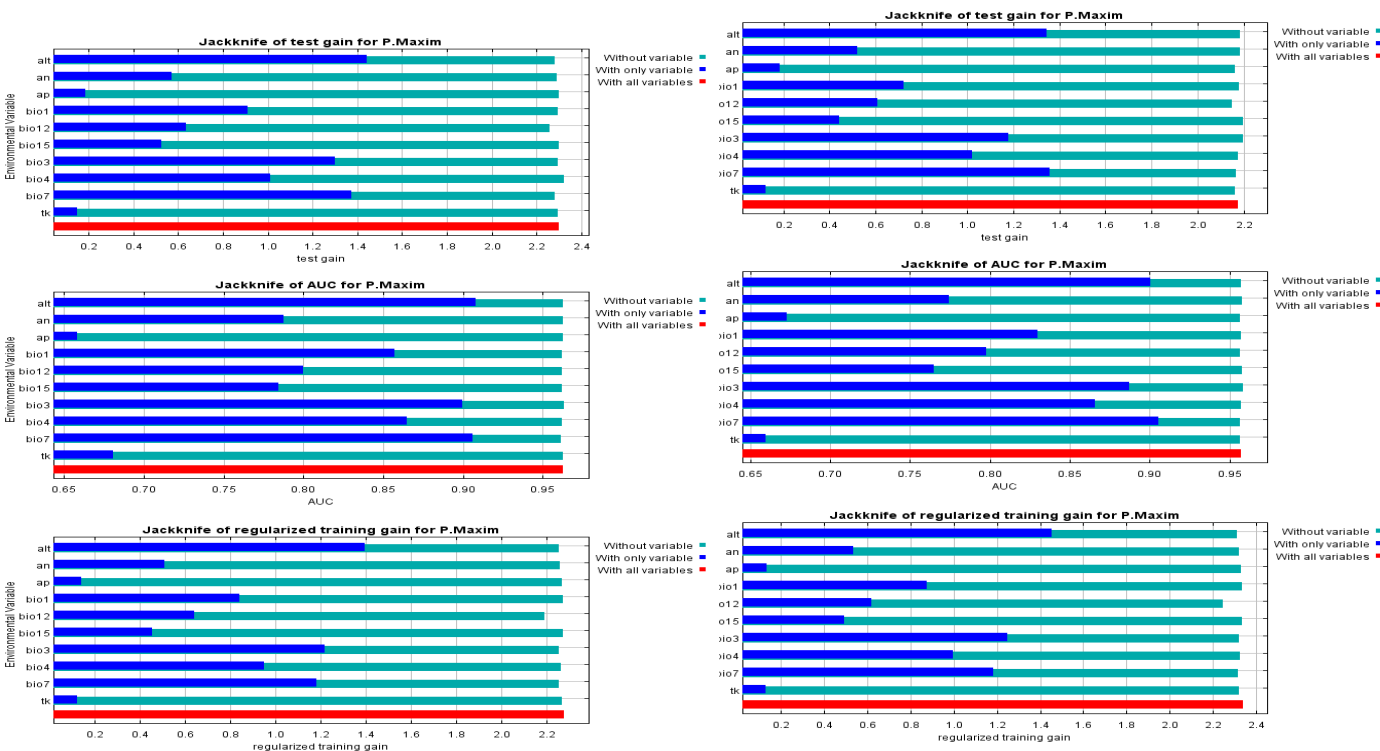

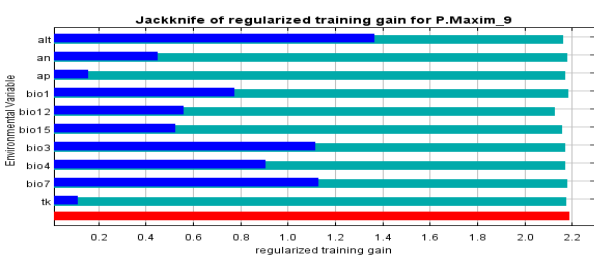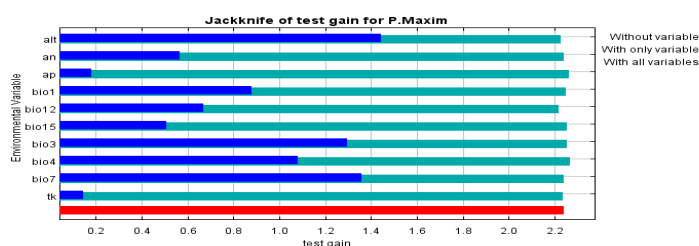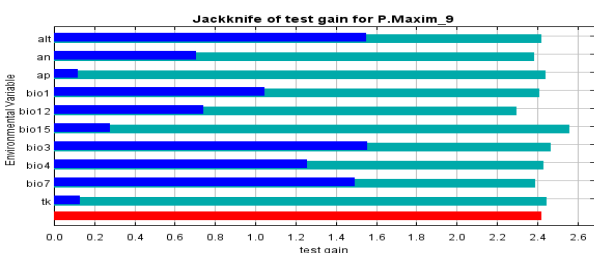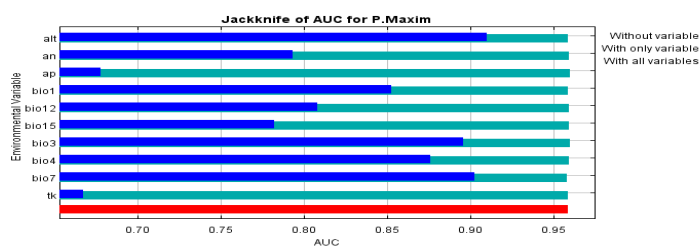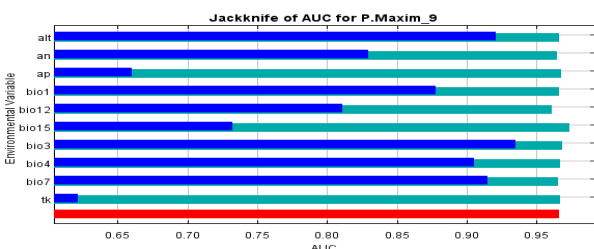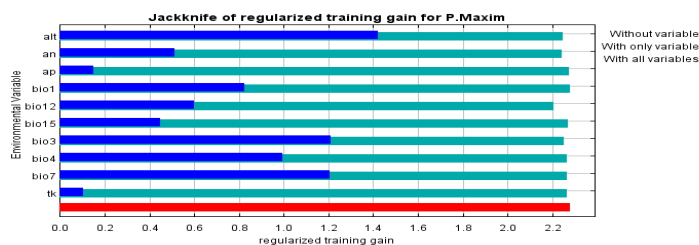

GIS-E2-R-RCP6.0-2050

GIS-E2-R-

RCP6.0-2070

GIS-E2-R-RCP8.5-2050

GIS-E2-R-RCP8.5-2070

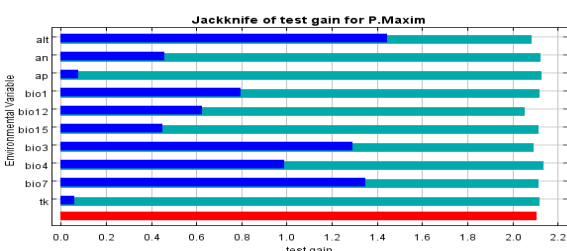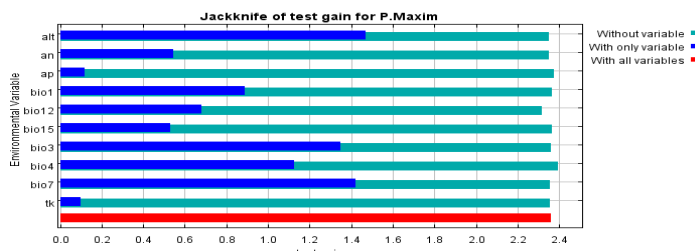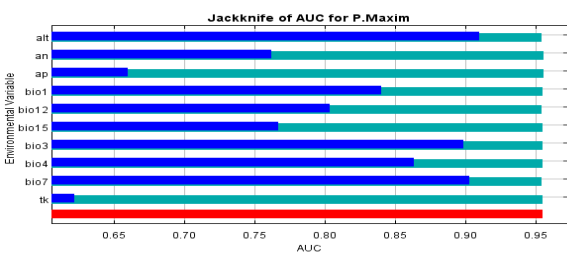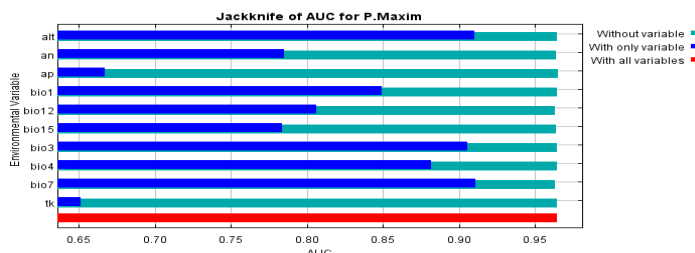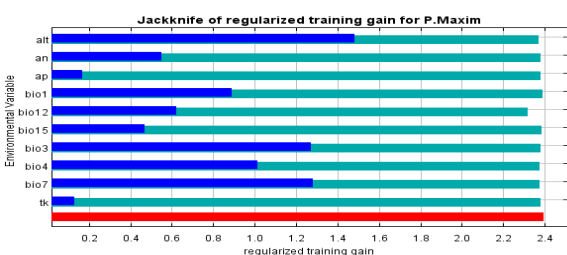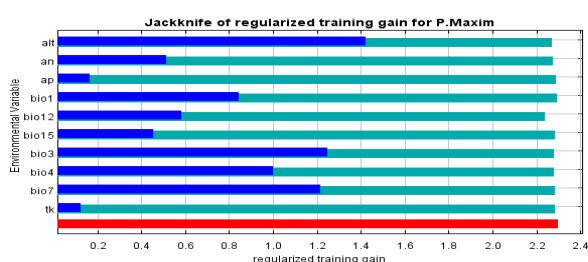

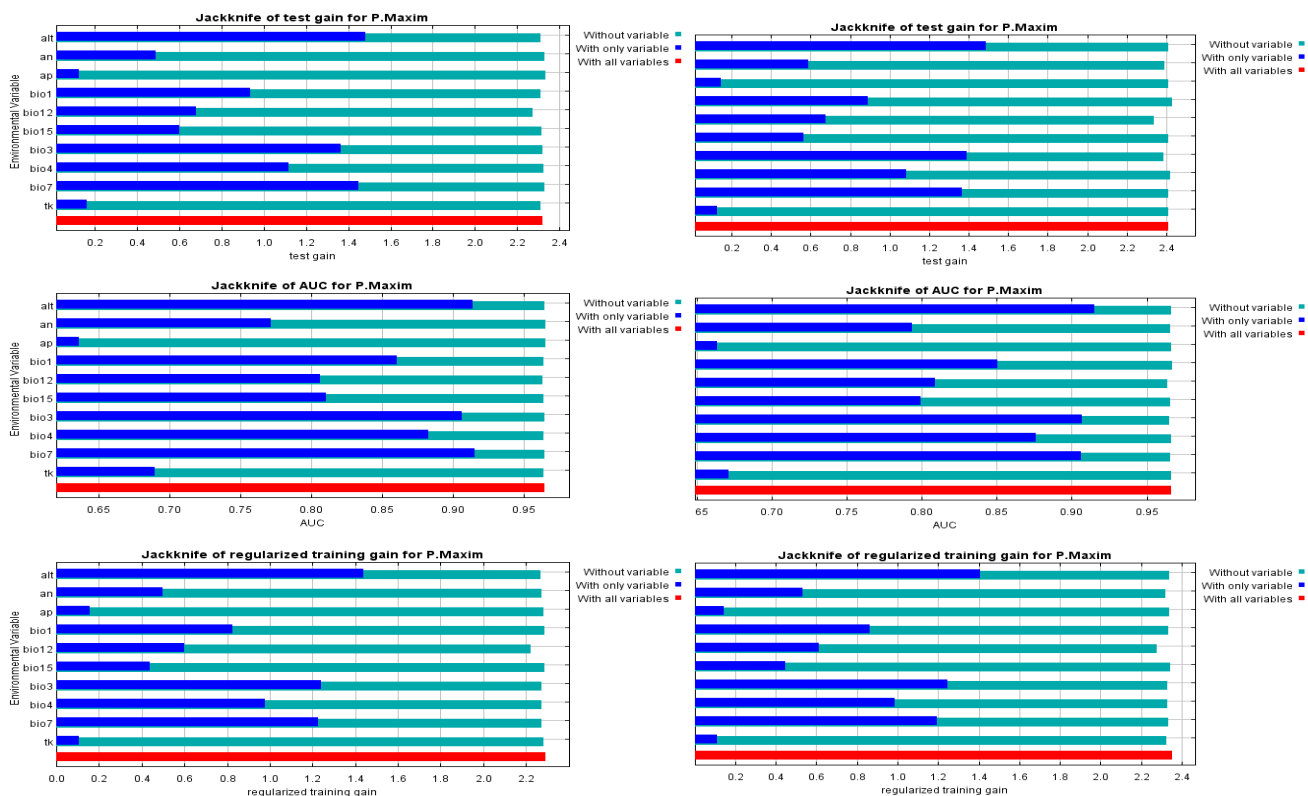

## HadGEM2-ES-RCP2.6-2050 HadGEM2-ES-RCP4.5-2050

## HadGEM2-ES-RCP2.6-2070 HadGEM2-ES-RCP4.5-2070

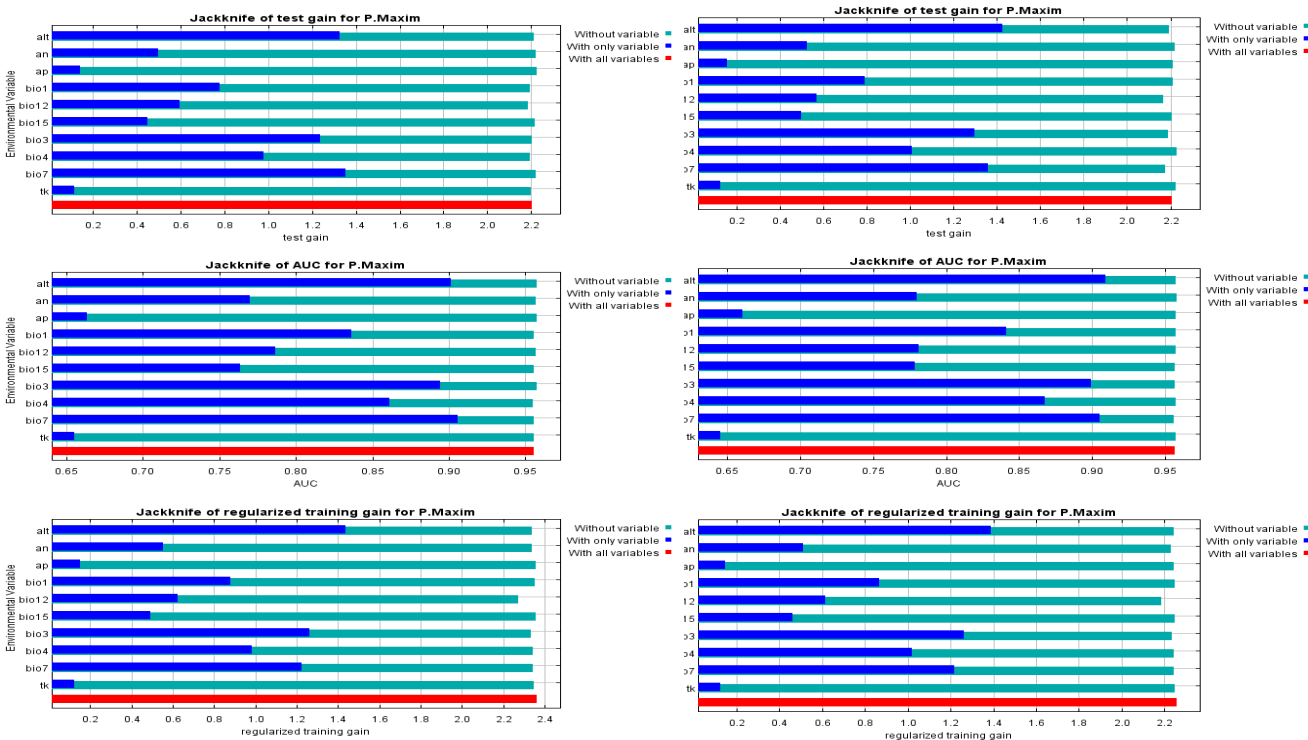

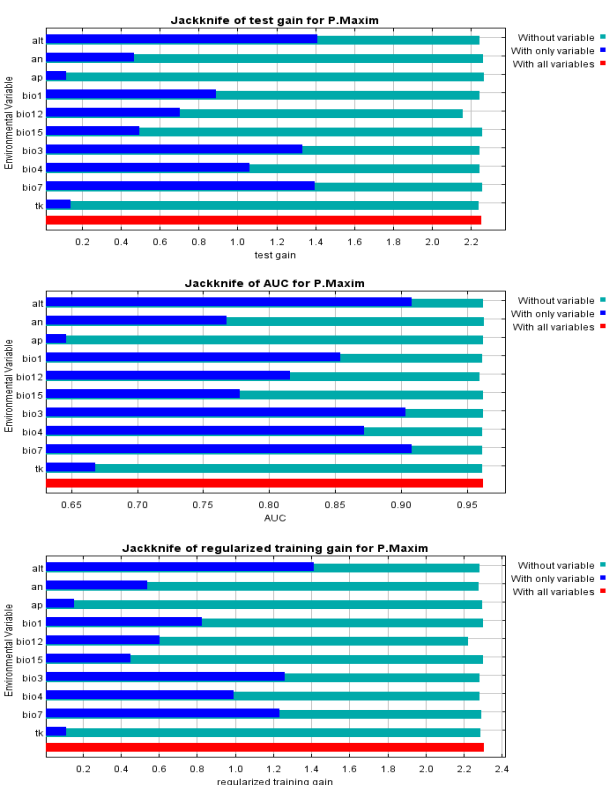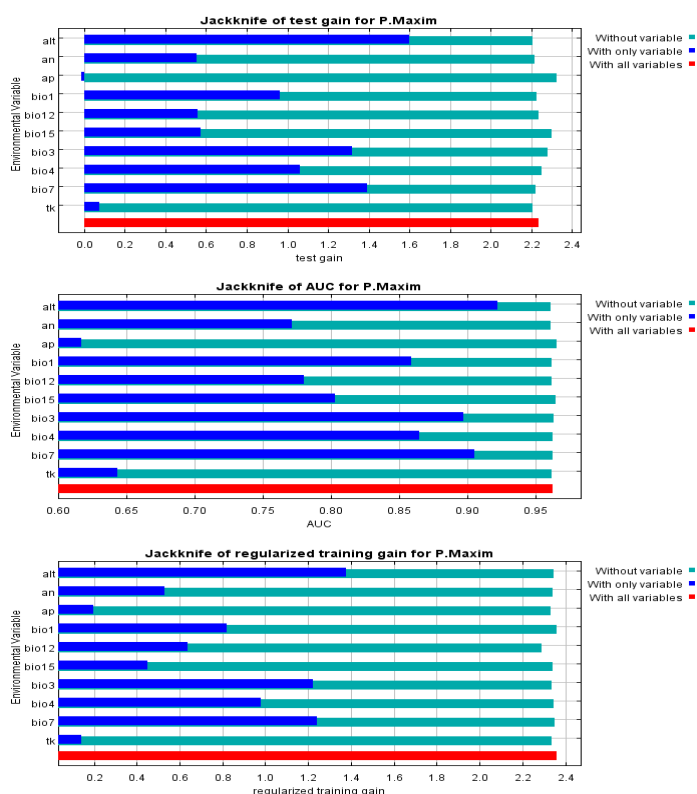

HadGEM2-ES-RCP8.5-2050  
HadGEM2-ES-RCP6.0 -2050

HadGEM2-ES-RCP8.5-2070 HadGEM2-ES-RCP6.0-2050

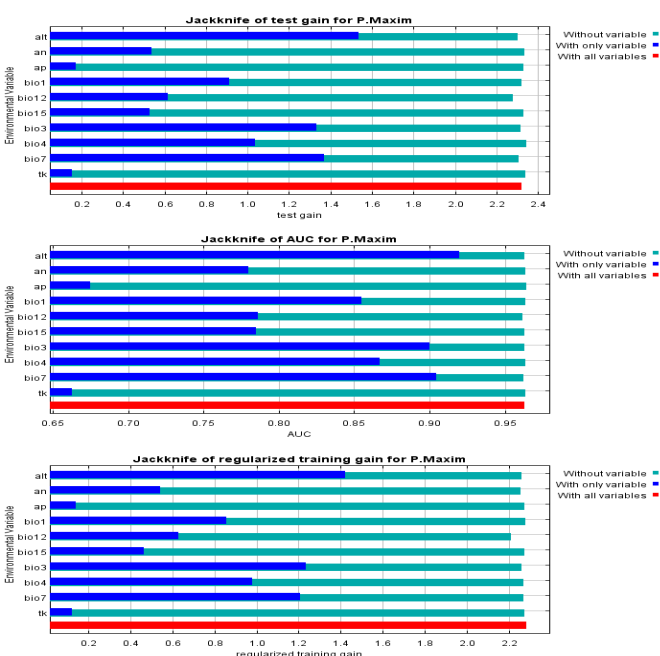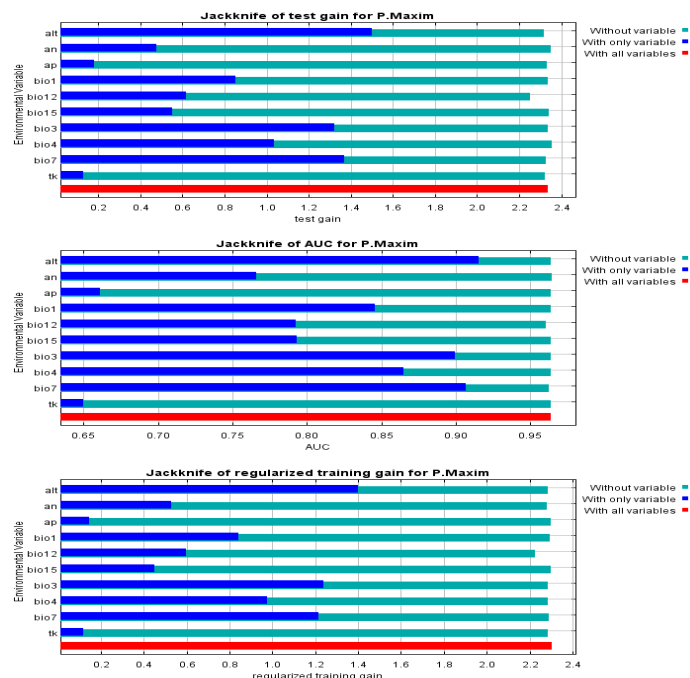

Supplement: s1 [file s1]
